# Supplementary material for: Phylogeny-directed discovery and mutagenesis of a tricyclic gersemiane synthase
Source: Royal Society of Chemistry journal article supplement (doi:10.1039/d5ob01208b), 2025-01-01
Supplement: d5ob01208b1.pdf [file d5ob01208b1.pdf]

## Supplementary Materials for

### **Phylogeny-directed discovery and mutagenesis of a tricyclic gersemiane synthase**

Xiaochen Chen,<sup>‡<sup>a</sup></sup> Bao Chen <sup>‡<sup>b</sup></sup> and Baofu Xu<sup>\*<sup>abc</sup></sup>

<sup>a</sup> Shandong First Medical University & Shandong Academy of Medical Sciences, Jinan 250117, China.

<sup>b</sup> Shandong Laboratory of Yantai Drug Discovery, Bohai Rim Advanced Research Institute for Drug Discovery, Yantai, Shandong 264117, China.

<sup>c</sup> State Key Laboratory of Drug Research, Shanghai Institute of Materia Medica, Chinese Academy of Sciences, 555 Zu Chong Zhi Road, Zhangjiang Hi-Tech Park, Shanghai 201203, China.

## Table of contents

|                                                                                                                                    |    |
|------------------------------------------------------------------------------------------------------------------------------------|----|
| Compound structure elucidation .....                                                                                               | 3  |
| Fig. S1. Sequence alignment of MicA homologs sharing >35% identity.....                                                            | 7  |
| Fig. S2. Crystal structures of Ag <sub>3</sub> Pz <sub>3</sub> and compound 5a highlighting the single-site binding mode.<br>..... | 8  |
| Fig. S3. Sequence alignment of TSs sharing >85% identities with MicA.....                                                          | 9  |
| Fig. S4. Sequence alignment of SsFitTS and TSs sharing >85% identity with MicA. ....                                               | 10 |
| Fig. S5. GC-MS chromatography (EIC, <i>m/z</i> 272) of SsFitTS mutants' activities.....                                            | 11 |
| Original spectra for compound <b>4</b> . ....                                                                                      | 12 |
| Original spectra for compound <b>5</b> . ....                                                                                      | 19 |
| Original spectra for compound <b>5a</b> . ....                                                                                     | 27 |
| Table S1. Strains and plasmids used in this study. ....                                                                            | 35 |
| Table S2. Primer sequences used in this study. ....                                                                                | 36 |
| Table S3. <sup>1</sup> H (600 MHz) and <sup>13</sup> C NMR (150 MHz) data of <b>4</b> and <b>5</b> in CDCl <sub>3</sub> . ....     | 37 |
| Table S4. <sup>1</sup> H (400 MHz) and <sup>13</sup> C NMR (100 MHz) data of <b>5a</b> in CDCl <sub>3</sub> . ....                 | 38 |

## Compound structure elucidation

Compound **4** was structurally characterized as identical to the eunicellane derivative produced by the MicA<sup>V220A</sup> mutant, by comparing its <sup>1</sup>H and <sup>13</sup>C NMR spectroscopic data (Figs. S4 and S5) to those reported in literature<sup>1</sup> and was further confirmed through 2D NMR analysis (Figs. S7-S10). For <sup>1</sup>H NMR (600 MHz) and <sup>13</sup>C NMR (150 MHz) spectral data, see Table S3.

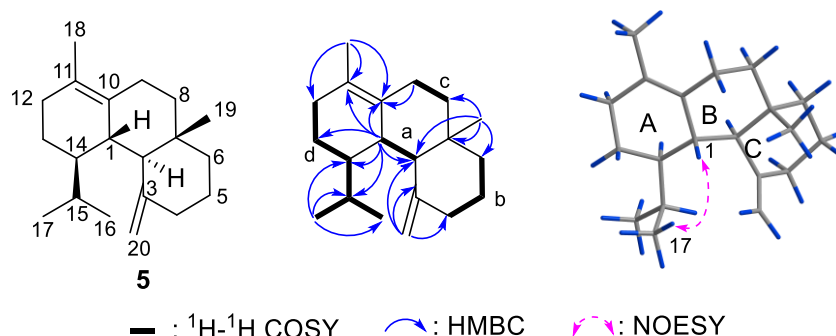

Compound **5** was obtained as a colorless oil, with its molecular formula (C<sub>20</sub>H<sub>32</sub>) determined by the GC-MS ion peak at *m/z* 272.2, indicating five degrees of unsaturation. The <sup>13</sup>C NMR and DEPT<sup>135</sup> spectra revealed 20 carbon signals, including four methyls, four methylenes, seven methines, and four quaternary carbons, accounting for two degrees of unsaturation and suggesting a tricyclic structure. Key <sup>1</sup>H-<sup>1</sup>H COSY correlations established four structural fragments: a) C-1 to C-2, b) C-4 to C-6, c) C-8 to C-9, and d) C-12 to C-17. HMBC correlations linked these fragments, with CH<sub>3</sub>-20 ( $\delta_{\text{H}}$  4.91/4.48) connecting C-2 ( $\delta_{\text{C}}$  57.1), C-3 ( $\delta_{\text{C}}$  149.2), and C-4 ( $\delta_{\text{C}}$  39.2) to merge fragments a and b, while CH<sub>3</sub>-18 ( $\delta_{\text{H}}$  1.62, s) with C-10 ( $\delta_{\text{C}}$  133.5), C-11 ( $\delta_{\text{C}}$  123.1) and C-12 ( $\delta_{\text{C}}$  27.9), combined with HMBC cross-peaks of H-9a ( $\delta_{\text{H}}$  2.48 dt, *J* = 12.9, 3.5 Hz) with C-10 allowed the connection of fragments c and d through C-10. Further HMBC correlations from H-1 ( $\delta_{\text{H}}$  2.17) to C-2, C-10, C-11, C-13 ( $\delta_{\text{C}}$  21.3), C-14 ( $\delta_{\text{C}}$  37.5), and C-15 ( $\delta_{\text{C}}$  27.9) confirmed the 6,6,6-tricyclic gersemiane scaffold and planar structure. NOESY analysis revealed a *trans* A/B ring junction (CH<sub>3</sub>-17/H-1 interaction), but the near-identical <sup>1</sup>H NMR shifts of CH<sub>3</sub>-16 ( $\delta_{\text{H}}$  0.90) and CH<sub>3</sub>-19 ( $\delta_{\text{H}}$  0.91) obscured absolute configuration determination. To resolve this, *m*CPBA-mediated epoxidation of **5** afforded derivative **5a**, which subsequently formed a eutectic mixture with Ag<sub>3</sub>Pz<sub>3</sub>. Single-crystal X-ray diffraction analysis of this complex unequivocally established the absolute configuration as 1*S*,2*R*,7*S*,10*S*,11*R*,14*R*. Compound **5** was identified as identical to both the gersemiane diterpene product formed through spontaneous conversion of MicA<sup>V220A</sup> during silica gel chromatography<sup>1</sup> and the catalytic product generated by the non-canonical terpene synthase PeuTPS<sup>1</sup>.

Compound **5**: colorless oil; [ $\alpha_{\text{D}}^{20}$ ] -29.6 (*c* 0.18, CHCl<sub>3</sub>); For <sup>1</sup>H NMR (600 MHz) and <sup>13</sup>C NMR (150 MHz) spectral data, see Table S3.

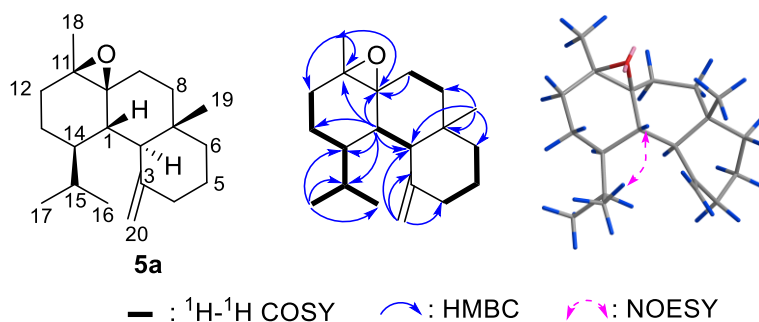

Compound **5a** was identified as an epoxy derivative of **5**, with the epoxide moiety located at C10 and C11. This structural assignment was supported by HMBC correlations from CH<sub>3</sub>-18 ( $\delta_{\text{H}}$  1.38) to C-10 ( $\delta_{\text{C}}$  67.8), C-11 ( $\delta_{\text{C}}$  61.7), and C-12 ( $\delta_{\text{C}}$  27.3). Further 2D NMR analysis (Figs. S22–S25) not only corroborated this hypothesis but also confirmed the planar structure of **5a** as a 10,11-epoxy derivative of **5**. The absolute configuration of **5a** was unambiguously determined by X-ray crystallography (Fig. S2) using Cu K $\alpha$  radiation.

```

WP_205789436.1 1 .....MTFTVPDLSVPFFERQNPVHVEAEVHVREYLRE
WP_194821225.1 1 MGPVDVVRQQRVETGTASNPIPEAVFMTFTVPDLSVPFFERQNPVHVEAEVHVREYLRE
WP_402894185.1 1 .....MTFTVPDLSVPFFERQNPVHVEAEVHVREYLRE
WP_357761745.1 1 .....MTFTVPDLSVPFFERQNPVHVEAEVHVREYLRE
WP_158224226.1 1 .....MTFTVPDLSVPFFERQNPVHVEAEVHVREYLRE
WP_302744595.1 1 .....MTFTVPDLSVPFFERQNPVHVEAEVHVREYLRE
WP_364309720.1 1 .....MTFTVPDLSVPFFERQNPVHVEAEVHVREYLRE
WP_157437290.1 1 .....MFSLPDLSVPFTELNPVHVEAEVHVREYLRE
WP_393216938.1 1 .....MFSLPDLSVPFTELNPVHVEAEVHVREYLRE
WP_407917939.1 1 .....MKTISIPELESAFASRTSPYADQAEQAARSYVRL
WP_262007089.1 1 .....MKIPLLACPYEPVSAQAQHVDESTRSYIRQ
WP_325156570.1 1 .....MEPLAALIPFASPFSPYAAQAEERVAHLRR
WP_326470589.1 1 .....MTAPAMPSSPFVRI SPFAAEAEERVAHLRR
WP_360350509.1 1 .....MHSALAAIAERFPSPSPYGPDAEERVGFARR
WP_353834681.1 1 .....MHSALAAIAERFPSPSPYGPDAEERVGFARR
WP_360580045.1 1 .....MHSALAAIAERFPSPSPYGPDAEERVGFARR
WP_345184177.1 1 .....MHSALAAIAERFPSPSPYGPDAEERVGFARR
MEA2844470.1 1 .....MGIIRLPDLSTPFFSRVNPVLEQAEQECRSMRR
MEA2703737.1 1 .....MGIIRLPDLSTPFFSRVNPVLEQAEQECRSMRR
WP_332003299.1 1 .....MTTIQMPITISYPSGLNQHVHEAQHIVSVTTS
WP_382528728.1 1 .....MGTRSARTAGGADPLVPFELCFFYRVNPRADQARAQLAEWVRR
WP_385137058.1 1 .....MGTRSARTAGGADPLVPFELCFFYRVNPRADQARAQLAEWVRR
WP_382872771.1 1 .....MGTRSARTAGGADPLVPFELCFFYRVNPRADQARAQLAEWVRR
WP_403897335.1 1 .....MGTRTAHTPGGADPLVPFELCFFYRVNPRADQARAQLAEWVRR
WP_385456676.1 1 .....MGTRSARTAGGADPLVPFELCFFYRVNPRADQARAQLAEWVRR
WP_385321608.1 1 .....MGTRSARTAGGADPLVPFELCFFYRVNPRADQARAQLAEWVRR

```

```

WP_205789436.1 34 FGLLRSEBAKFHYDRTRFGELVARAYPFAALEELCVITDWMVWVAIFDDYLERIFDAQDD
WP_194821225.1 61 FGLLRSEBAKFHYDRTRFGELVARAYPFAALEELCVITDWMVWVAIFDDYLERIFDAQDD
WP_402894185.1 34 FGLLRSEBAKFHYDRTRFGELVARAYPFAALEELCVITDWMVWVAIFDDYLERIFDAQDD
WP_357761745.1 34 FGLLRSEBAKFHYDRTRFGELVARAYPFAALEELCVITDWMVWVAIFDDYLERIFDAQDD
WP_158224226.1 34 FGLLRSEBAKFHYDRTRFGELVARAYPFAALEELCVITDWMVWVAIFDDYLERIFDAQDD
WP_302744595.1 34 FGLLRSEBAKFHYDRTRFGELVARAYPFAALEELCVITDWMVWVAIFDDYLERIFDAQDD
WP_364309720.1 34 FGLLRSEBAKFHYDRTRFGELVARAYPFAALEELCVITDWMVWVAIFDDYLERIFDAQDD
WP_157437290.1 33 FGLLRSEBAKFHYDRTRFGELVGRAYPFALEPELCVITDWMVWVAIFDDYLERIFDAQDD
WP_393216938.1 33 FGLLRSEBAKFHYDRTRFGELVGRAYPFALEPELCVITDWMVWVAIFDDYLERIFDAQDD
WP_407917939.1 35 MGLLRSEBAKFHYDRTRFGELVGRAYPFALEPELCVITDWMVWVAIFDDYLERIFDAQDD
WP_262007089.1 32 HGLHSKQALYHYDHTGFGQLAARIYDAGKDELTLISRWIAIWAIFDDYLERIFDAQDD
WP_325156570.1 36 CGLLPAGAGADYFYGRLGLYTAQIYDLPALPDLPIVAVWFCVWMTMDDYLERIFDAQDD
WP_326470589.1 33 CGLLRSEBAKFHYDRTRFGELVGRAYPFALEPELCVITDWMVWVAIFDDYLERIFDAQDD
WP_360350509.1 34 HGLLRSEBAKFHYDRTRFGELVGRAYPFALEPELCVITDWMVWVAIFDDYLERIFDAQDD
WP_353834681.1 34 HGLLRSEBAKFHYDRTRFGELVGRAYPFALEPELCVITDWMVWVAIFDDYLERIFDAQDD
WP_360580045.1 34 HGLLRSEBAKFHYDRTRFGELVGRAYPFALEPELCVITDWMVWVAIFDDYLERIFDAQDD
WP_345184177.1 34 HGLLRSEBAKFHYDRTRFGELVGRAYPFALEPELCVITDWMVWVAIFDDYLERIFDAQDD
MEA2844470.1 35 FGLVTSEKAGAHYDAHRFGELVGRAYPFALEPELCVITDWMVWVAIFDDYLERIFDAQDD
MEA2703737.1 35 FGLVTSEKAGAHYDAHRFGELVGRAYPFALEPELCVITDWMVWVAIFDDYLERIFDAQDD
WP_332003299.1 35 YGLLTTETAHRRFEKARFAWLAARAFYDAAALHELIIADFNWTLFIDDDYLERIFDAQDD
WP_382528728.1 46 TGLVRRSEBAKFHYDRTRFGELVGRAYPFALEPELCVITDWMVWVAIFDDYLERIFDAQDD
WP_385137058.1 46 TGLVRRSEBAKFHYDRTRFGELVGRAYPFALEPELCVITDWMVWVAIFDDYLERIFDAQDD
WP_382872771.1 46 TGLVRRSEBAKFHYDRTRFGELVGRAYPFALEPELCVITDWMVWVAIFDDYLERIFDAQDD
WP_403897335.1 46 TGLVRRSEBAKFHYDRTRFGELVGRAYPFALEPELCVITDWMVWVAIFDDYLERIFDAQDD
WP_385456676.1 46 TGLVRRSEBAKFHYDRTRFGELVGRAYPFALEPELCVITDWMVWVAIFDDYLERIFDAQDD
WP_385321608.1 46 TGLVRRSEBAKFHYDRTRFGELVGRAYPFALEPELCVITDWMVWVAIFDDYLERIFDAQDD

```

```

WP_205789436.1 94 ERFVALIHETVSWFPLTPPGAVA.RSGN..PIELAIRDIWDRLTARSSTLWRRRFVRLT
WP_194821225.1 121 ERFVALIHETVSWFPLTPPGAVA.RSGN..PIELAIRDIWDRLTARSSTLWRRRFVRLT
WP_402894185.1 94 ERFVALIHETVSWFPLTPPGTVA.RSGN..PIELAIRDIWDRLTARSSTLWRRRFVRLT
WP_357761745.1 94 ERFVALIHETVSWFPLTPPGTAV.RSGN..PIELAIRDIWDRLTARSSTLWRRRFVRLT
WP_158224226.1 94 ERFVALIHETVSWFPLTPPGTAV.RSGN..PIELAIRDIWDRLTARSSTLWRRRFVRLT
WP_302744595.1 94 ERFVALIHETVSWFPLTPPGTAV.RSGN..PIELAIRDIWDRLTARSSTLWRRRFVRLT
WP_364309720.1 94 ERFVALIHETVSWFPLTPPGTAV.RSGN..PIELAIRDIWDRLTARSSTLWRRRFVRLT
WP_157437290.1 93 ERFVALIHETVSWFPLTPPGTAV.RSGN..PIELAIRDIWDRLTARSSTLWRRRFVRLT
WP_393216938.1 93 ERFVALIHETVSWFPLTPPGTAV.RSGN..PIELAIRDIWDRLTARSSTLWRRRFVRLT
WP_407917939.1 93 ERFVALIHETVSWFPLTPPGTAV.RSGN..PIELAIRDIWDRLTARSSTLWRRRFVRLT
WP_262007089.1 92 ERFVALIHETVSWFPLTPPGTAV.RSGN..PIELAIRDIWDRLTARSSTLWRRRFVRLT
WP_325156570.1 96 AAVRLVADAMLTWLGRLRAPPDP.HVV...PFQAGFGGAWADLRRLSFVWQRRFLTHTE
WP_326470589.1 93 AAVDLVAERMIWLDSR.RPRTG.ADG...PFATGFGGAWAGMRACSSAGWQRRFLTHTE
WP_360350509.1 93 AAFENASAAALLSTLSDSAVATQ.AVAHLQPFGAFLVWVHQAAMAAARSIDWRRRFVSTVA
WP_353834681.1 93 AAFENASAAALLSTLSDSAVATQ.AVAHLQPFGAFLVWVHQAAMAAARSIDWRRRFVSTVA
WP_360580045.1 93 AAFENASAAALLSTLSDSAVATQ.AVAHLQPFGAFLVWVHQAAMAAARSIDWRRRFVSTVA
WP_345184177.1 93 AAFENASAAALLSTLSDSAVATQ.AVAHLQPFGAFLVWVHQAAMAAARSIDWRRRFVSTVA
MEA2844470.1 95 QFRQVIRVVRSLWRIGDGPVIEH.SDMP...LAAAFRLDWRRTAARTSRPWQRRFLTHTE
MEA2703737.1 95 QFRQVIRVVRSLWRIGDGPVIEH.SDMP...LAAAFRLDWRRTAARTSRPWQRRFLTHTE
WP_332003299.1 95 D...FLRSMAGLMDILHNNRQVTPETGGP.ISAALSISWERMRAITSPAWRRFLTHTE
WP_382528728.1 106 EGLGHVDSVVRGVLEAADFAGLRHHRDGVPLVVSLLADLWCRTAPEASVRRRRFVRLHW
WP_385137058.1 106 EGLGHVDSVVRGVLEAADFAGLRHHRDGVPLVVSLLADLWCRTAPEASVRRRRFVRLHW
WP_382872771.1 106 EGLGHVDSVVRGVLEAADFAGLRHHRDGVPLVVSLLADLWCRTAPEASVRRRRFVRLHW
WP_403897335.1 106 EGLGHVDSVVRGVLEAADFAGLRHHRDGVPLVVSLLADLWCRTAPEASVRRRRFVRLHW
WP_385456676.1 106 EGLGHVDSVVRGVLEAADFAGLRHHRDGVPLVVSLLADLWCRTAPEASVRRRRFVRLHW
WP_385321608.1 106 EGLGHVDSVVRGVLEAADFAGLRHHRDGVPLVVSLLADLWCRTAPEASVRRRRFVRLHW

```



WP\_205789436.1 151 DYLEG.CHWESHNRNRGIAPDLPYIIRTRRRFGGMRPSMDLSEIIGLGIELTDDVHAHPR  
 WP\_194821225.1 178 DYLEG.CHWESHNRNRGIAPDLPYIIRTRRRFGGMRPSMDLSEIIGLGIELTDDVHAHPR  
 WP\_402894185.1 151 DYLEG.CHWESHNRNRGIAPDLPYIIRTRRRFGGMRPSMDLSEIIGLGIELTDDVHAHPR  
 WP\_357761745.1 151 DYLEG.CHWESHNRNRGIAPDLPYIIRTRRRFGGMRPSMDLSEIIGLGIELTDDVHAHPR  
 WP\_158224226.1 151 DYLEG.CHWESHNRNRGIAPDLPYIIRTRRRFGGMRPSMDLSEIIGLGIELTDDVHAHPR  
 WP\_302744595.1 151 DYLEG.CHWESHNRNRGIAPDLPYIIRTRRRFGGMRPSMDLSEIIGLGIELTDDVHAHPR  
 WP\_364309720.1 151 DYLEG.CHWESHNRNRGIAPDLPYIIRTRRRFGGMRPSMDLSEIIGLGIELTDDVHAHPR  
 WP\_157437290.1 150 DYLEG.CHWESHNRNRGIAPDLPYIIRTRRRFGGMRPSMDLSEIIGLGIELTDDVHAHPR  
 WP\_393216938.1 150 DYLEG.CHWESHNRNRGIAPDLPYIIRTRRRFGGMRPSMDLSEIIGLGIELTDDVHAHPR  
 WP\_407917939.1 150 SYLEG.TRWEEAANRGLRRVPDLSEFVAVRRDFGGIRLMDLAEELGGGYELPDDVHRSQAL  
 WP\_262007089.1 149 DYLVG.ARWEEAGNRFMARTPTLDSYTVARRRFGGIRMAAMDIAELGGGYELPSEVLDSSPL  
 WP\_325156570.1 152 QYLDG.CLWEATNRYTGTVPITLKSIEEQRRRFGGIRAAAMDISEFATGYELPERVHDDPLT  
 WP\_326470589.1 148 QYLAG.CRWEEADNRSAATVPDLSEYVFRRRRFGGIRAAAMDISEFGGGYELPGVHGAAPV  
 WP\_360350509.1 152 DYLDG.CRWEEAAMRQAERPPDVATFIERRRAYGGIKEAMALVEVSDFELPVTLHEDPYV  
 WP\_353834681.1 152 DYLDG.CRWEEAAMRQAERPPDVATFIERRRAYGGIKEAMALVEVSDFELPVTLHEDPYV  
 WP\_360580045.1 152 DYLDG.CRWEEAAMRQAERPPDVATFIERRRAYGGIKEAMALVEVSDFELPVTLHEDPYV  
 WP\_345184177.1 152 DYLDG.CRWEEAAMRQAERPPDVATFIERRRAYGGIKEAMALVEVSDFELPVTLHEDPYV  
 MEA2844470.1 151 DYHRS.CEBEAVLRRGRHVSDVATSIALLRDNAAPRFGFTLGELAGRYELPEALLSDSRM  
 MEA2703737.1 151 DYHRS.CEBEAVLRRGRHVSDVATSIALLRDNAAPRFGFTLGELAGRYELPEALLSDSRM  
 WP\_332003299.1 151 DYFTS.CIWEAENRREGITPSIADYVHMRPYTGALLADIEAIEIIEKIYLSREVPQLPV  
 WP\_382528728.1 166 DCLAAATVWEAGNRVRGTVPDEATYIEQRRHTGAIYVCMDLIEIVEGIDVPGDLYDSAEF  
 WP\_385137058.1 166 DCLAAATVWEAGNRVRGTVPDEATYIEQRRHTGAIYVCMDLIEIVEGIDVPGDLYDSAEF  
 WP\_382872771.1 166 DCLAAATVWEAGNRVRGTVPDEATYIEQRRHTGAIYVCMDLIEIVEGIDVPGDLYDSAEF  
 WP\_403897335.1 166 DCLVAATVWEAGNRVRGTVPDEATYIEQRRHTGAIYVCMDLIEIVEGIDVPGDLYDSAEF  
 WP\_385456676.1 166 DCLAAATVWEAGNRVRGTVPDEATYIEQRRHTGAIYVCMDLIEIVEGIDVPGDLYDSAEF  
 WP\_385321608.1 166 DCLAAATVWEAGNRVRGTVPDEATYIEQRRHTGAIYVCMDLIEIVEGIDVPGDLYDSAEF

WP\_205789436.1 210 QQLDNTADLVLVWANDVFSVEAEKREGNVNNIVLVVQRTRGSMREAADDEVAMLRGRCA  
 WP\_194821225.1 237 QQLDNTADLVLVWANDVFSVEAEKREGNVNNIVLVVQRTRGSMREAADDEVAMLRGRCA  
 WP\_402894185.1 210 QQLDNTADLVLVWANDVFSVEAEKREGNVNNIVLVVQRTRGSMREAADDEVAMLRGRCA  
 WP\_357761745.1 210 QQLDNTADLVLVWANDVFSVEAEKREGNVNNIVLVVQRTRGSMREAADDEVAMLRGRCA  
 WP\_158224226.1 210 QQLDNTADLVLVWANDVFSVEAEKREGNVNNIVLVVQRTRGSMREAADDEVAMLRGRCA  
 WP\_302744595.1 210 QQLDNTADLVLVWANDVFSVEAEKREGNVNNIVLVVQRTRGSMREAADDEVAMLRGRCA  
 WP\_364309720.1 210 QQLDNTADLVLVWANDVFSVEAEKREGNVNNIVLVVQRTRGSMREAADDEVAMLRGRCA  
 WP\_157437290.1 209 QQLDNTADLVLVWANDVFSVEAEKREGNVNNIVLVVQRTRGSMREAADDEVAMLRGRCA  
 WP\_393216938.1 209 QQLDNTADLVLVWANDVFSVEAEKREGNVNNIVLVVQRTRGSMREAADDEVAMLRGRCA  
 WP\_407917939.1 209 QQLDNTADLVLVWANDVFSVEAEKREGNVNNIVLVVQRTRGSMREAADDEVAMLRGRCA  
 WP\_262007089.1 208 VEAVDNLGDIALWANDIFSLSLTVDLLEEGNVSNLVVLQGHWEESLEQATGRAIAMLEDVVG  
 WP\_325156570.1 211 QDLDVLGDITLWGNDFSVGVDAEEGNVSNLVFVLQHRHLCGVNNAATAVSRMLVGRRLR  
 WP\_326470589.1 207 QDLDVLGDITLWGNDFSVGVDAEEGNVSNLVFVLQHRHLCGVNNAATAVSRMLVGRRLR  
 WP\_360350509.1 211 VRLMDALGDIALWGNDFSVSLEVVDQER.TPNLIVVLHAERGGTMDACRNEVVDVMAARVA  
 WP\_353834681.1 211 VRLMDALGDIALWGNDFSVSLEVVDQER.TPNLIVVLHAERGGTMDACRNEVVDVMAARVA  
 WP\_360580045.1 211 VRLMDALGDIALWGNDFSVSLEVVDQER.TPNLIVVLHAERGGTMDACRNEVVDVMAARVA  
 WP\_345184177.1 211 VRLMDALGDIALWGNDFSVSLEVVDQER.TPNLIVVLHAERGGTMDACRNEVVDVMAARVA  
 MEA2844470.1 210 LAVQRAASDAITIGNDITLGLESLLIHGVRNNITVLLALYERGGTLQEADEAGRTFRSLIA  
 MEA2703737.1 210 LAVQRAASDAITIGNDITLGLESLLIHGVRNNITVLLALYERGGTLQEADEAGRTFRSLIA  
 WP\_332003299.1 210 QRMIAQCANNIVCWANDIFSCTKEARQGDVHNLVLVLQHARQCTLQEAINEAARMHNEEIA  
 WP\_382528728.1 226 TAALDAACDVVCTNDVYSLDKERALGEVHNLAYLVQYHRGLDREGALAEVCAAIISARTE  
 WP\_385137058.1 226 TAALDAACDVVCTNDVYSLDKERALGEVHNLAYLVQYHRGLDREGALAEVCAAIISARTE  
 WP\_382872771.1 226 TAALDAACDVVCTNDVYSLDKERALGEVHNLAYLVQYHRGLDREGALAEVCAAIISARTE  
 WP\_403897335.1 226 TAALDAACDVVCTNDVYSLDKERALGEVHNLAYLVQYHRGLDREGALAEVCAAIISARTE  
 WP\_385456676.1 226 TAALDAACDVVCTNDVYSLDKERALGEVHNLAYLVQYHRGLDREGALAEVCAAIISARTE  
 WP\_385321608.1 226 TAALDAACDVVCTNDVYSLDKERALGEVHNLAYLVQYHRGLDREGALAEVCAAIISARTE

WP\_205789436.1 270 DFVAASRSVAFAFFASSGGYTAEQAHQVSRYYAAMESWVRGNIDWSRGNERYSRSEHLRTGE  
 WP\_194821225.1 297 DFVAASRSVAFAFFASSGGYTAEQAHQVSRYYAAMESWVRGNIDWSRGNERYSRSEHLRTGE  
 WP\_402894185.1 270 DFVAASRSVAFAFFASSGGYTAEQAHQVSRYYAAMESWVRGNIDWSRGNERYSRSEHLRTGE  
 WP\_357761745.1 270 DFVAASRSVAFAFFASSGGYTAEQAHQVSRYYAAMESWVRGNIDWSRGNERYSRSEHLRTGE  
 WP\_158224226.1 270 DFVAASRSVAFAFFASSGGYTAEQAHQVSRYYAAMESWVRGNIDWSRGNERYSRSEHLRTGE  
 WP\_302744595.1 270 DFVAASRSVAFAFFASSGGYTAEQAHQVSRYYAAMESWVRGNIDWSRGNERYSRSEHLRTGE  
 WP\_364309720.1 270 DFVAASRSVAFAFFASSGGYTAEQAHQVSRYYAAMESWVRGNIDWSRGNERYSRSEHLRTGE  
 WP\_157437290.1 269 DFVAESDSAFAFFASSGGYTAEQAHQVSRYYAAMESWVRGNIDWSRGNERYSRSEHLRTGE  
 WP\_393216938.1 269 DFVAESDSAFAFFASSGGYTAEQAHQVSRYYAAMESWVRGNIDWSRGNERYSRSEHLRTGE  
 WP\_407917939.1 269 ELAPAEELRAWLRDAPQGV.CVRDVRDYLQVHTWISGNIHWSRRNERYSRAPRSSD  
 WP\_262007089.1 268 DLPTAEVRLRDWSRATG.QGPTVQRDIERYIDGMHTWISGNDHWSRGNERYSRAPRVSD  
 WP\_325156570.1 271 LLRRLESRLPRCCAALR.LTPTQCRDVGRFVAGMHTWISGNIAWSRDNTYRSRAPRVGG  
 WP\_326470589.1 267 RLRLADELADWCVFQH.LHPRRCALRFVVEGLHTWISGNIAWSAANSRYVTARGRTGG  
 WP\_360350509.1 270 DFERSRSLDQWRTHRG.ISDEKALDLRFIQGMHDWISGSFAWSTDNERYAQAARFGADS  
 WP\_353834681.1 270 DFERSRSLDQWRTHRG.IPNEKALDLRFIQGMHDWISGSFAWSTDNERYAQAARFGADS  
 WP\_360580045.1 270 DFERYSRLDQWRTHRG.ISDEKALDLRFIQGMHDWISGSFAWSTDNERYAQAARFGADS  
 WP\_345184177.1 270 DFERYSRLDQWRTHRG.ISDEKALDLRFIQGMHDWISGSFAWSTDNERYAQAARFGADS  
 MEA2844470.1 270 DLVWLEDGLPPCYRELGL.LSDTARSDADSYVRTLHDWIEGGIEWQRTSARYRVIAKLTEA  
 MEA2703737.1 270 DLVWLEDGLPPCYRELGL.LSDTARSDADSYVRTLHDWIEGGIEWQRTSARYRVIAKLTEA  
 WP\_332003299.1 270 IFVLALEKLLPLKGL.....AEADYELLRYSVLRSWITGNYDWSVKDTGRYGTGVGEV  
 WP\_382528728.1 286 RFLAAEKEKLLGAR.....PGDAASLVPYTAGMRTWIRGNLDWSRRTKRYQDPAAGGAD  
 WP\_385137058.1 286 RFLAAEKEKLLGAR.....PGDAASLVPYTAGMRTWIRGNLDWSRRTKRYQDPAAGGAD  
 WP\_382872771.1 286 RFLAAEKEKLLGAR.....PGDAASLVPYTAGMRTWIRGNLDWSRRTKRYQDPAAGGAD  
 WP\_403897335.1 286 RFLAAEKEKLLGAR.....PGDAASLVPYTAGMRTWIRGNLDWSRRTKRYQDPAAGGAD  
 WP\_385456676.1 286 RFLAAEKEKLLGAR.....PGDAASLVPYTAGMRTWIRGNLDWSRRTKRYQDPAAGGAD  
 WP\_385321608.1 286 RFLAAEKEKLLGAR.....PGDAASLVPYTAGMRTWIRGNLDWSRRTKRYQDPAAGGAD

|                |     |       |       |                           |       |
|----------------|-----|-------|-------|---------------------------|-------|
| WP_205789436.1 | 330 | DQPNF | L     | ERAGQP                    | ..... |
| WP_194821225.1 | 357 | DQPNF | L     | ERAGQP                    | ..... |
| WP_402894185.1 | 330 | DQPNF | L     | ERAGQP                    | ..... |
| WP_357761745.1 | 330 | DQPNF | L     | ERAGQP                    | ..... |
| WP_158224226.1 | 330 | DQPNF | L     | ERAGQP                    | ..... |
| WP_302744595.1 | 330 | DQPNF | L     | ERAGQP                    | ..... |
| WP_364309720.1 | 330 | DQPNF | L     | ERAGQP                    | ..... |
| WP_157437290.1 | 329 | DQPNF | L     | ETAAQK                    | ..... |
| WP_393216938.1 | 329 | DQPNF | L     | ERVV                      | ..... |
| WP_407917939.1 | 327 | TQAGV | L     | LTGQR                     | ..... |
| WP_262007089.1 | 327 | LQPNL | L     | LQAVDLTSRTPQARQARPTARGGGR |       |
| WP_325156570.1 | 330 | SQPNF | L     | LALVPG                    | ..... |
| WP_326470589.1 | 326 | SQPNF | L     | LALLPG                    | ..... |
| WP_360350509.1 | 329 | IQPNA | L     | ASLGLERQEAGAQVAAEQS       | ..... |
| WP_353834681.1 | 329 | IQPNA | L     | ASLGLKRQDAGAQVAAEQS       | ..... |
| WP_360580045.1 | 329 | IQPNA | L     | ASLGLKRQDAGAQVAAEQS       | ..... |
| WP_345184177.1 | 329 | IQPNA | L     | ASLGLKRQDAGAQVAAEQS       | ..... |
| MEA2844470.1   | 329 | DFPNP | L     | ASLVADQALSHS              | ..... |
| MEA2703737.1   | 329 | EFPNP | L     | ASLVADQALSHS              | ..... |
| WP_332003299.1 | 323 | AA    | ..... |                           |       |
| WP_382528728.1 | 339 | RPVEY | V     | EPCLMGVAR                 | ..... |
| WP_385137058.1 | 339 | RPVEY | V     | EPCLMGVAR                 | ..... |
| WP_382872771.1 | 339 | RPVEY | V     | EPCLMGVAR                 | ..... |
| WP_403897335.1 | 339 | RPVEY | V     | EPCLMGVAR                 | ..... |
| WP_385456676.1 | 339 | RPVEY | V     | EPRLMGVAR                 | ..... |
| WP_385321608.1 | 339 | RPVEY | V     | EPCLMGVAR                 | ..... |

**Fig. S1. Sequence alignment of MicA homologs sharing >35% identity.**

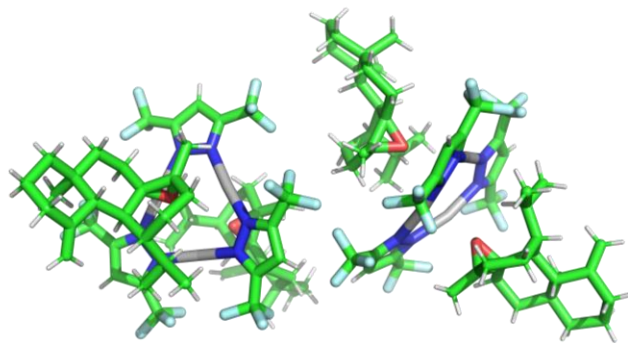

**Fig. S2.** Crystal structures of Ag<sub>3</sub>Pz<sub>3</sub> and compound 5a highlighting the single-site binding mode.



WP\_205789436.1\_MicA 1 .....MTFTVPDLSVPFPERQNPVDEAEVHVREYLRE  
 WP\_194821225.1 1 MGPVDVRQEQRVETGTASNPPEAVFMTFTVPDLSVPFPERQNPVDEAEVHVREYLRE  
 WP\_402894185.1 1 .....MTFTVPDLSVPFPERQNPVDEAEVHVREYLRE  
 WP\_357761745.1 1 .....MTFTVPDLSVPFPERQNPVDEAEVHVREYLRE  
 WP\_158224226.1 1 .....MTFTVPDLSVPFPERQNPVDEAEVHVREYLRE  
 WP\_302744595.1 1 .....MTFTVPDLSVPFPERQNPVDEAEVHVREYLRE  
 WP\_364309720.1 1 .....MTFTVPDLSVPFPERQNPVDEAEVHVREYLRE  
 WP\_157437290.1 1 .....MTFTVPDLSVPFPERQNPVDEAEVHVREYLRE  
 WP\_393216938.1 1 .....MTFTVPDLSVPFPERQNPVDEAEVHVREYLRE

WP\_205789436.1\_MicA 34 FGLLRSEAKFHYDRTRFGEVVARAYPPFALEELCVITDWMVAVWIFDDYLERIPDAQDD  
 WP\_194821225.1 61 FGLLRSEAKFHYDRTRFGEVVARAYPPFALEELCVITDWMVAVWIFDDYLERIPDAQDD  
 WP\_402894185.1 34 FGLLRSEAKFHYDRTRFGEVVARAYPPFALEELCVITDWMVAVWIFDDYLERIPDAQDD  
 WP\_357761745.1 34 FGLLRSEAKFHYDRTRFGEVVARAYPPFALEELCVITDWMVAVWIFDDYLERIPDAQDD  
 WP\_158224226.1 34 FGLLRSEAKFHYDRTRFGEVVARAYPPFALEELCVITDWMVAVWIFDDYLERIPDAQDD  
 WP\_302744595.1 34 FGLLRSEAKFHYDRTRFGEVVARAYPPFALEELCVITDWMVAVWIFDDYLERIPDAQDD  
 WP\_364309720.1 34 FGLLRSEAKFHYDRTRFGEVVARAYPPFALEELCVITDWMVAVWIFDDYLERIPDAQDD  
 WP\_157437290.1 33 FGLLRSEAKFHYDRTRFGEVVARAYPPFALEELCVITDWMVAVWIFDDYLERIPDAQDD  
 WP\_393216938.1 33 FGLLRSEAKFHYDRTRFGEVVARAYPPFALEELCVITDWMVAVWIFDDYLERIPDAQDD

WP\_205789436.1\_MicA 94 ERFVALIHETISWFPLTPPGAVARSGNPIELAIRDIWDRLTARSSITWRRRFVRLHTDYL  
 WP\_194821225.1 121 ERFVALIHETISWFPLTPPGAVARSGNPIELAIRDIWDRLTARSSITWRRRFVRLHTDYL  
 WP\_402894185.1 94 ERFVALIHETISWFPLTPPGAVARSGNPIELAIRDIWDRLTARSSITWRRRFVRLHTDYL  
 WP\_357761745.1 94 ERFVALIHETISWFPLTPPGAVARSGNPIELAIRDIWDRLTARSSITWRRRFVRLHTDYL  
 WP\_158224226.1 94 ERFVALIHETISWFPLTPPGAVARSGNPIELAIRDIWDRLTARSSITWRRRFVRLHTDYL  
 WP\_302744595.1 94 ERFVALIHETISWFPLTPPGAVARSGNPIELAIRDIWDRLTARSSITWRRRFVRLHTDYL  
 WP\_364309720.1 94 ERFVALIHETISWFPLTPPGAVARSGNPIELAIRDIWDRLTARSSITWRRRFVRLHTDYL  
 WP\_157437290.1 93 ERFVALIHETISWFPLTPPGAVARSGNPIELAIRDIWDRLTARSSITWRRRFVRLHTDYL  
 WP\_393216938.1 93 ERFVALIHETISWFPLTPPGAVARSGNPIELAIRDIWDRLTARSSITWRRRFVRLHTDYL

WP\_205789436.1\_MicA 154 EGCHWESNNRRRGVAPDLPTYIRTRRRFGGMRPSMDLSEIGLGIELTDDVHAHPRIQQLL  
 WP\_194821225.1 181 EGCHWESNNRRRGVAPDLPTYIRTRRRFGGMRPSMDLSEIGLGIELTDDVHAHPRIQQLL  
 WP\_402894185.1 154 EGCHWESNNRRRGVAPDLPTYIRTRRRFGGMRPSMDLSEIGLGIELTDDVHAHPRIQQLL  
 WP\_357761745.1 154 EGCHWESNNRRRGVAPDLPTYIRTRRRFGGMRPSMDLSEIGLGIELTDDVHAHPRIQQLL  
 WP\_158224226.1 154 EGCHWESNNRRRGVAPDLPTYIRTRRRFGGMRPSMDLSEIGLGIELTDDVHAHPRIQQLL  
 WP\_302744595.1 154 EGCHWESNNRRRGVAPDLPTYIRTRRRFGGMRPSMDLSEIGLGIELTDDVHAHPRIQQLL  
 WP\_364309720.1 154 EGCHWESNNRRRGVAPDLPTYIRTRRRFGGMRPSMDLSEIGLGIELTDDVHAHPRIQQLL  
 WP\_157437290.1 153 EGCHWESNNRRRGVAPDLPTYIRTRRRFGGMRPSMDLSEIGLGIELTDDVHAHPRIQQLL  
 WP\_393216938.1 153 EGCHWESNNRRRGVAPDLPTYIRTRRRFGGMRPSMDLSEIGLGIELTDDVHAHPRIQQLL

WP\_205789436.1\_MicA 214 DNTADLVWANDVFSVEAEKRGNVNNIVVQTRGGSMREAADEVAGMLRGRCAADFVA  
 WP\_194821225.1 241 DNTADLVWANDVFSVEAEKRGNVNNIVVQTRGGSMREAADEVAGMLRGRCAADFVA  
 WP\_402894185.1 214 DNTADLVWANDVFSVEAEKRGNVNNIVVQTRGGSMREAADEVAGMLRGRCAADFVA  
 WP\_357761745.1 214 DNTADLVWANDVFSVEAEKRGNVNNIVVQTRGGSMREAADEVAGMLRGRCAADFVA  
 WP\_158224226.1 214 DNTADLVWANDVFSVEAEKRGNVNNIVVQTRGGSMREAADEVAGMLRGRCAADFVA  
 WP\_302744595.1 214 DNTADLVWANDVFSVEAEKRGNVNNIVVQTRGGSMREAADEVAGMLRGRCAADFVA  
 WP\_364309720.1 214 DNTADLVWANDVFSVEAEKRGNVNNIVVQTRGGSMREAADEVAGMLRGRCAADFVA  
 WP\_157437290.1 213 DNTADLVWANDVFSVEAEKRGNVNNIVVQTRGGSMREAADEVAGMLRGRCAADFVA  
 WP\_393216938.1 213 DNTADLVWANDVFSVEAEKRGNVNNIVVQTRGGSMREAADEVAGMLRGRCAADFVA

WP\_205789436.1\_MicA 274 ASRSAAVAFFASSGGYTAEQAHQVSRVYAAEESWVRGNIDWSRGNERYSRSEHLRTGEDQPN  
 WP\_194821225.1 301 ASRSAAVAFFASSGGYTAEQAHQVSRVYAAEESWVRGNIDWSRGNERYSRSEHLRTGEDQPN  
 WP\_402894185.1 274 ASRSAAVAFFASSGGYTAEQAHQVSRVYAAEESWVRGNIDWSRGNERYSRSEHLRTGEDQPN  
 WP\_357761745.1 274 ASRSAAVAFFASSGGYTAEQAHQVSRVYAAEESWVRGNIDWSRGNERYSRSEHLRTGEDQPN  
 WP\_158224226.1 274 ASRSAAVAFFASSGGYTAEQAHQVSRVYAAEESWVRGNIDWSRGNERYSRSEHLRTGEDQPN  
 WP\_302744595.1 274 ASRSAAVAFFASSGGYTAEQAHQVSRVYAAEESWVRGNIDWSRGNERYSRSEHLRTGEDQPN  
 WP\_364309720.1 274 ASRSAAVAFFASSGGYTAEQAHQVSRVYAAEESWVRGNIDWSRGNERYSRSEHLRTGEDQPN  
 WP\_157437290.1 273 ASRSAAVAFFASSGGYTAEQAHQVSRVYAAEESWVRGNIDWSRGNERYSRSEHLRTGEDQPN  
 WP\_393216938.1 273 ASRSAAVAFFASSGGYTAEQAHQVSRVYAAEESWVRGNIDWSRGNERYSRSEHLRTGEDQPN

WP\_205789436.1\_MicA 334 FLERAGQP  
 WP\_194821225.1 361 FLERAGQP  
 WP\_402894185.1 334 FLERAGQP  
 WP\_357761745.1 334 FLERAGQP  
 WP\_158224226.1 334 FLERAGQP  
 WP\_302744595.1 334 FLERAGQP  
 WP\_364309720.1 334 FLERAGQP  
 WP\_157437290.1 333 FLETAAQK  
 WP\_393216938.1 333 FLERVV..

Fig. S3. Sequence alignment of TSs sharing >85% identities with MicA.

WP\_205789436.1 1 . . . . . MTFVPLDLSVFFPERQNPVDEAEVHVREYRE  
 WP\_194821225.1 1 MGPVDVRQEQRVETGTASNPIPPBAVF MTFVPLDLSVFFPERQNPVDEAEVHVREYRE  
 WP\_402894185.1 1 . . . . . MTFVPLDLSVFFPERQNPVDEAEVHVREYRE  
 WP\_357761745.1 1 . . . . . MTFVPLDLSVFFPERQNPVDEAEVHVREYRK  
 WP\_158224226.1 1 . . . . . MTFVPLDLSVFFPERQNPVDEAEVHVREYRK  
 WP\_302744595.1 1 . . . . . MTFVPLDLSVFFPERQNPVDEAEVHVREYRE  
 WP\_364309720.1 1 . . . . . MTFVPLDLSVFFPERQNPVDEAEVHVREYRK  
 WP\_157437290.1 1 . . . . . MFSLPDLSVFFTELNRNPVDEAEVHVREYRE  
 WP\_393216938.1 1 . . . . . MFSLPDLSVFFTELNRNPVDEAEVHVREYRE  
 WP\_262007089.1 1 . . . . . MKIPLLACEYEPVSAAYAQHVDESTRSRYRQ

WP\_205789436.1 34 FGLRSEAEKHHYDRTRFGEVLVARAYPFAPLEELCVITDWMVWAIFFDDYLERIPDAQDD  
 WP\_194821225.1 61 FGLRSEAEKHHYDRTRFGEVLVARAYPFAPLEELCVITDWMVWAIFFDDYLERIPDAQDD  
 WP\_402894185.1 34 FGLRSEAEKHHYDRTRFGEVLVARAYPFAPLEELCVITDWMVWAIFFDDYLERIPDAQDD  
 WP\_357761745.1 34 FGLRSEAEKHHYDRTRFGEVLVARAYPFAPLEELCVITDWMVWAIFFDDYLERIPDAQGD  
 WP\_158224226.1 34 FGLRSEAEKHHYDRTRFGEVLVARAYPFAPLEELCVITDWMVWAIFFDDYLERIPDAQGD  
 WP\_302744595.1 34 FGLRSEAEKHHYDRTRFGEVLVARAYPFAPLEELCVITDWMVWAIFFDDYLERIPDAQGD  
 WP\_364309720.1 34 FGLRSEAEKHHYDRTRFGEVLVARAYPFAPLEELCVITDWMVWAIFFDDYLERIPDAQGD  
 WP\_157437290.1 33 FGLRSEAEKHHYDRTRFGEVLVARAYPFAPLEELCVITDWMVWAIFFDDYLERIPDAQSD  
 WP\_393216938.1 33 FGLRSEAEKHHYDRTRFGEVLVARAYPFAPLEELCVITDWMVWAIFFDDYLERIPDAQSD  
 WP\_262007089.1 32 HGLRSEKQALYHYDHTSEFQLAARIYPDAGKDELTLISRWIAIWAIFDDQLKVPDEQDR

WP\_205789436.1 94 ERFVALIHETVSWFPLTPPGAVARS GNPIELAIRDIWDRLTARSSLTWRRREVVRHLDYDYL  
 WP\_194821225.1 121 ERFVALIHETVSWFPLTPPGAVARS GNPIELAIRDIWDRLTARSSLTWRRREVVRHLDYDYL  
 WP\_402894185.1 94 ERFVALIHETVSWFPLTPPGTAVARS GNPIELAIRDIWDRLTARSSLTWRRREVVRHLDYDYL  
 WP\_357761745.1 94 ERFVALIHETVSWFPLTPPGTAVARS GNPIELAIRDIWDRLTARSSLTWRRREVVRHLDYDYL  
 WP\_158224226.1 94 ERFVALIHETVSWFPLTPPGTAVARS GNPIELAIRDIWDRLTARSSLTWRRREVVRHLDYDYL  
 WP\_302744595.1 94 ERFVALIHETVSWFPLTPPGTAVARS GNPIELAIRDIWDRLTARSSLTWRRREVVRHLDYDYL  
 WP\_364309720.1 94 ERFVALIHETVSWFPLTPPGTAVARS GNPIELAIRDIWDRLTARSSLTWRRREVVRHLDYDYL  
 WP\_157437290.1 93 ERFVALIHETVSWFPLTPPGTAVARS GNPIELAIRDIWDRLTARSSLTWRRREVVRHLDYDYL  
 WP\_393216938.1 93 ERFVALIHETVSWFPLTPPGTAVARS GNPIELAIRDIWDRLTARSSLTWRRREVVRHLDYDYL  
 WP\_262007089.1 92 EVLNNAVNTAE SWFSDPFVDSSETAE SPFRAALLEMLGEIAKMMSKDQVTRFLADARBYL

WP\_205789436.1 154 EGCHWESHNRNRGIAPDLPITYIRTRRRFGGMRPSMDLSEIGLGIELTDDVHAHPRIQQLL  
 WP\_194821225.1 181 EGCHWESHNRNRGIAPDLPITYIRTRRRFGGMRPSMDLSEIGLGIELTDDVHAHPRIQQLL  
 WP\_402894185.1 154 EGCHWESHNRNRGIAPDLPITYIRTRRRFGGMRPSMDLSEIGLGIELTDDVHAHPRIQQLL  
 WP\_357761745.1 154 EGCHWESHNRNRGIAPDLPITYIRTRRRFGGMRPSMDLSEIGLGIELTDDVHAHPRIQQLL  
 WP\_158224226.1 154 EGCHWESHNRNRGIAPDLPITYIRTRRRFGGMRPSMDLSEIGLGIELTDDVHAHPRIQQLL  
 WP\_302744595.1 154 EGCHWESHNRNRGIAPDLPITYIRTRRRFGGMRPSMDLSEIGLGIELTDDVHAHPRIQQLL  
 WP\_364309720.1 154 EGCHWESHNRNRGIAPDLPITYIRTRRRFGGMRPSMDLSEIGLGIELTDDVHAHPRIQQLL  
 WP\_157437290.1 153 EGCHWESHNRNRGIAPDLPITYIRTRRRFGGMRPSMDLSEIGLGIELTDDVHAHPRIQQLL  
 WP\_393216938.1 153 EGCHWESHNRNRGIAPDLPITYIRTRRRFGGMRPSMDLSEIGLGIELTDDVHAHPRIQQLL  
 WP\_262007089.1 152 VGARWEAGNRNFMARTPTLDSYTVARRRFGGMRPSMDLSEIGLGIELTDDVHAHPRIQQLL

WP\_205789436.1 214 DNTADLVWLWANDVFSVEAEKREGNVNNIVLVVQTRGGSMREAADEVAAMLRGRCADEFVA  
 WP\_194821225.1 241 DNTADLVWLWANDVFSVEAEKREGNVNNIVLVVQTRGGSMREAADEVAAMLRGRCADEFVA  
 WP\_402894185.1 214 DNTADLVWLWANDVFSVEAEKREGNVNNIVLVVQTRGGSMREAADEVAAMLRGRCADEFVA  
 WP\_357761745.1 214 DNTADLVWLWANDVFSVEAEKREGNVNNIVLVVQTRGGSMREAADEVAAMLRGRCADEFVA  
 WP\_158224226.1 214 DNTADLVWLWANDVFSVEAEKREGNVNNIVLVVQTRGGSMREAADEVAAMLRGRCADEFVA  
 WP\_302744595.1 214 DNTADLVWLWANDVFSVEAEKREGNVNNIVLVVQTRGGSMREAADEVAAMLRGRCADEFVA  
 WP\_364309720.1 214 DNTADLVWLWANDVFSVEAEKREGNVNNIVLVVQTRGGSMREAADEVAAMLRGRCADEFVA  
 WP\_157437290.1 213 DNTADLVWLWANDVFSVEAEKREGNVNNIVLVVQTRGGSMREAADEVAAMLRGRCADEFVA  
 WP\_393216938.1 213 DNTADLVWLWANDVFSVEAEKREGNVNNIVLVVQTRGGSMREAADEVAAMLRGRCADEFVA  
 WP\_262007089.1 212 DNTADLVWLWANDVFSVEAEKREGNVNNIVLVVQTRGGSMREAADEVAAMLRGRCADEFVA

WP\_205789436.1 274 ASRSAAVAFFASSGGYTAEQAQVSRYYAAMESWVRGNIDWSRGNERYRSEHLRTGEDQPN  
 WP\_194821225.1 301 ASRSAAVAFFASSGGYTAEQAQVSRYYAAMESWVRGNIDWSRGNERYRSEHLRTGEDQPN  
 WP\_402894185.1 274 ASRSAAVAFFASSGGYTAEQAQVSRYYAAMESWVRGNIDWSRGNERYRSEHLRTGEDQPN  
 WP\_357761745.1 274 ASRSAAVAFFASSGGYTAEQAQVSRYYAAMESWVRGNIDWSRGNERYRSEHLRTGEDQPN  
 WP\_158224226.1 274 ASRSAAVAFFASSGGYTAEQAQVSRYYAAMESWVRGNIDWSRGNERYRSEHLRTGEDQPN  
 WP\_302744595.1 274 ASRSAAVAFFASSGGYTAEQAQVSRYYAAMESWVRGNIDWSRGNERYRSEHLRTGEDQPN  
 WP\_364309720.1 274 ASRSAAVAFFASSGGYTAEQAQVSRYYAAMESWVRGNIDWSRGNERYRSEHLRTGEDQPN  
 WP\_157437290.1 273 ESDSAAVAFFASSGGYTAEQAQVSRYYAAMESWVRGNIDWSRGNERYRSEHLRTGEDQPN  
 WP\_393216938.1 273 ESDSAAVAFFASSGGYTAEQAQVSRYYAAMESWVRGNIDWSRGNERYRSEHLRTGEDQPN  
 WP\_262007089.1 272 AEVRLRDWSRATG.QGPTVQRDIERYIDGHTWISGNHWSRGNERYRSEHLRTGEDQPN

WP\_205789436.1 334 FLERAGQP . . . . .  
 WP\_194821225.1 361 FLERAGQP . . . . .  
 WP\_402894185.1 334 FLERAGQP . . . . .  
 WP\_357761745.1 334 FLERAGQP . . . . .  
 WP\_158224226.1 334 FLERAGQP . . . . .  
 WP\_302744595.1 334 FLERAGQP . . . . .  
 WP\_364309720.1 334 FLERAGQP . . . . .  
 WP\_157437290.1 333 FLETAQK . . . . .  
 WP\_393216938.1 333 FLERVV . . . . .  
 WP\_262007089.1 331 LLLQAVDLTSRTTPQARQARPTARGGGR

Fig. S4. Sequence alignment of SsFitTS and TSs sharing >85% identity with MicA.

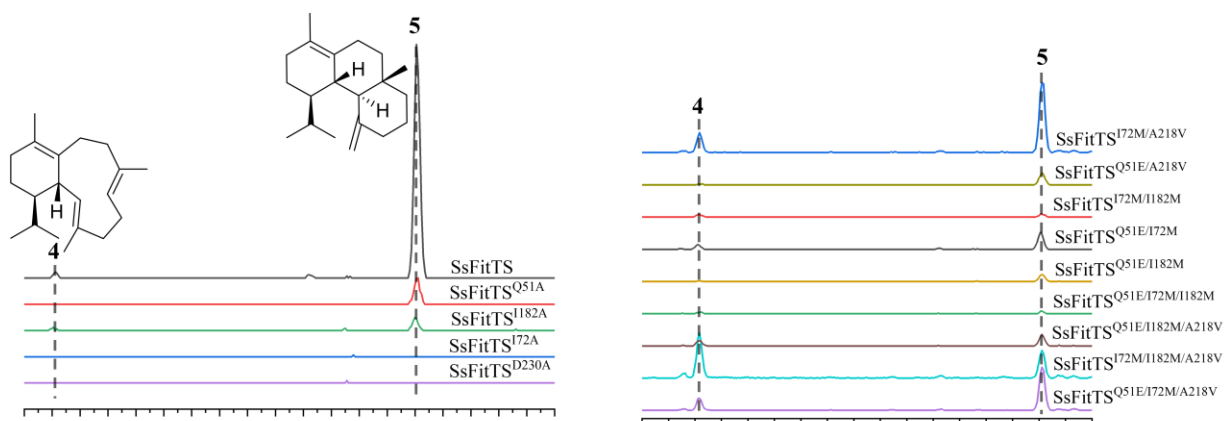

**Fig. S5. GC-MS chromatography (EIC,  $m/z$  272) of SsFitTS mutants' activities.**

Alanine scanning mutagenesis of the selected key amino acid residues revealed that the SsFitTS<sup>I72A</sup> and SsFitTS<sup>D230A</sup> mutants lost their ability to synthesize compound **5**, while the SsFitTS<sup>Q51A</sup> and SsFitTS<sup>I182A</sup> mutants exhibited severely impaired enzymatic activity. Double and triple mutants of residues (Q51E, I72M, I182M, and A218V) associated with enhanced production of the bicyclic eunicellane compound **4** were also constructed and compared to the wild-type SsFitTS. Although none of the mutants exclusively produced compound **4**, the triple mutant SsFitTS<sup>I72M/I182M/A218V</sup> showed a higher yield of compound **4** relative to the tricyclic gersemiane compound **5**. These results further indicate that these residues play a critical role in the re-protonation process catalyzed by SsFitTS.

Original spectra for compound 4.

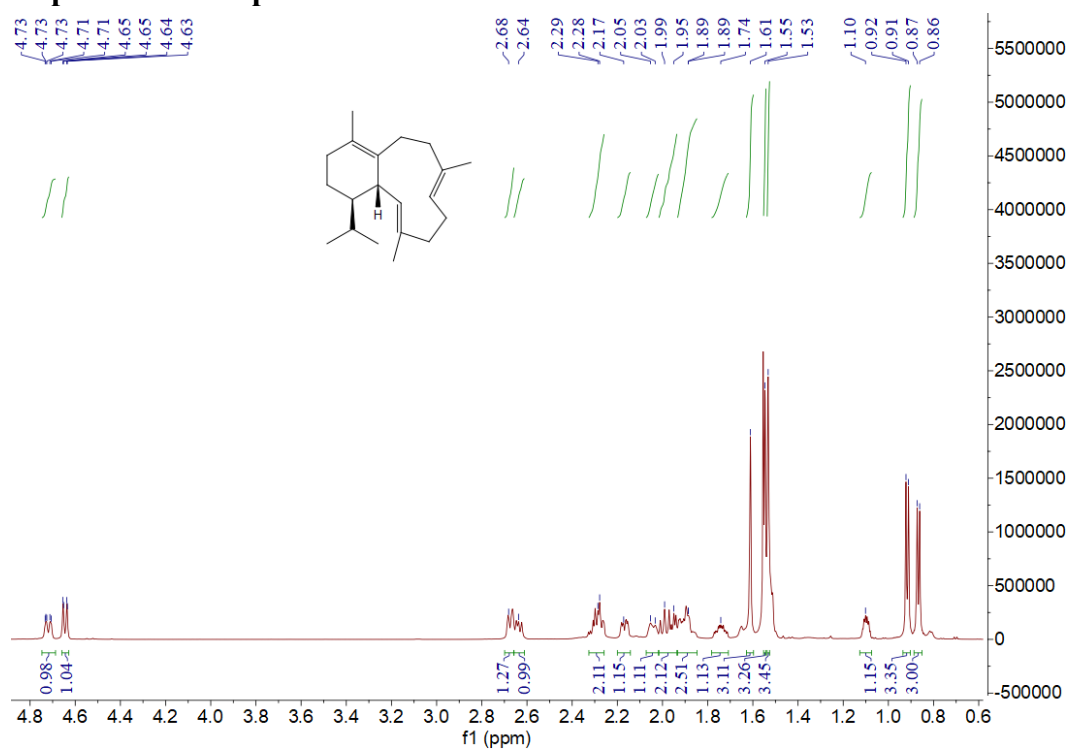

Fig. S6. <sup>1</sup>H NMR spectrum (600 MHz) of compound 4 in CDCl<sub>3</sub>.

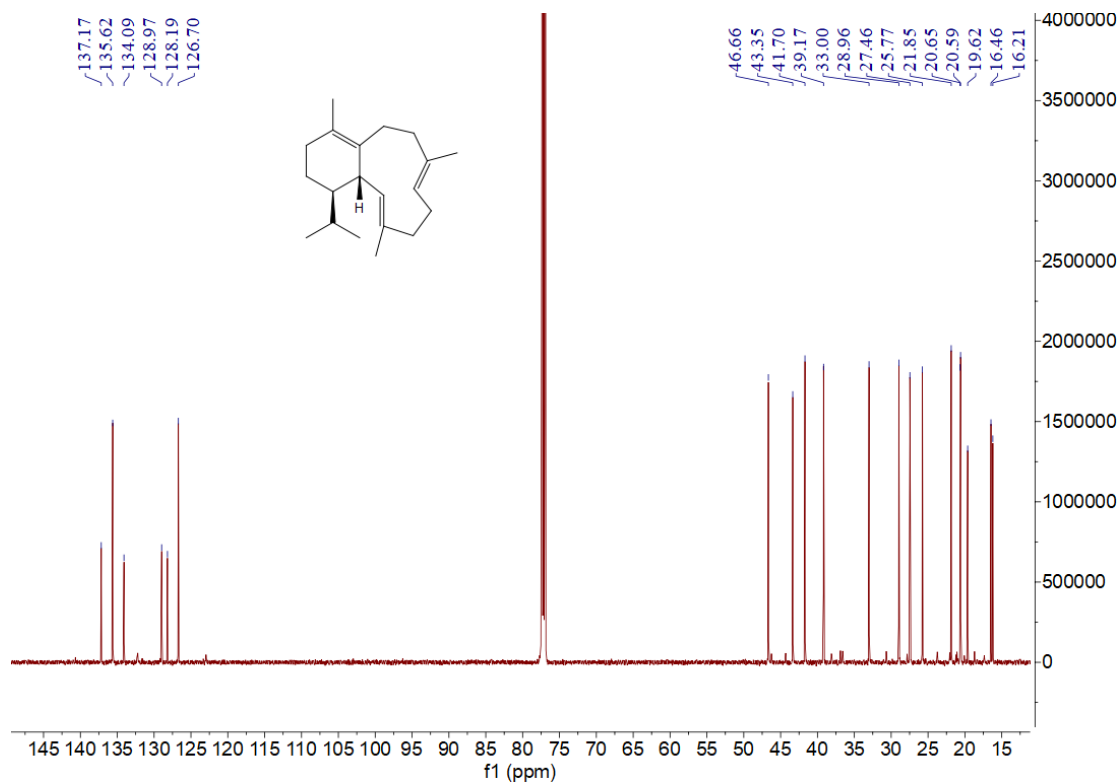

**Fig. S7.** <sup>13</sup>C NMR spectrum (150 MHz) of compound **4** in CDCl<sub>3</sub>.

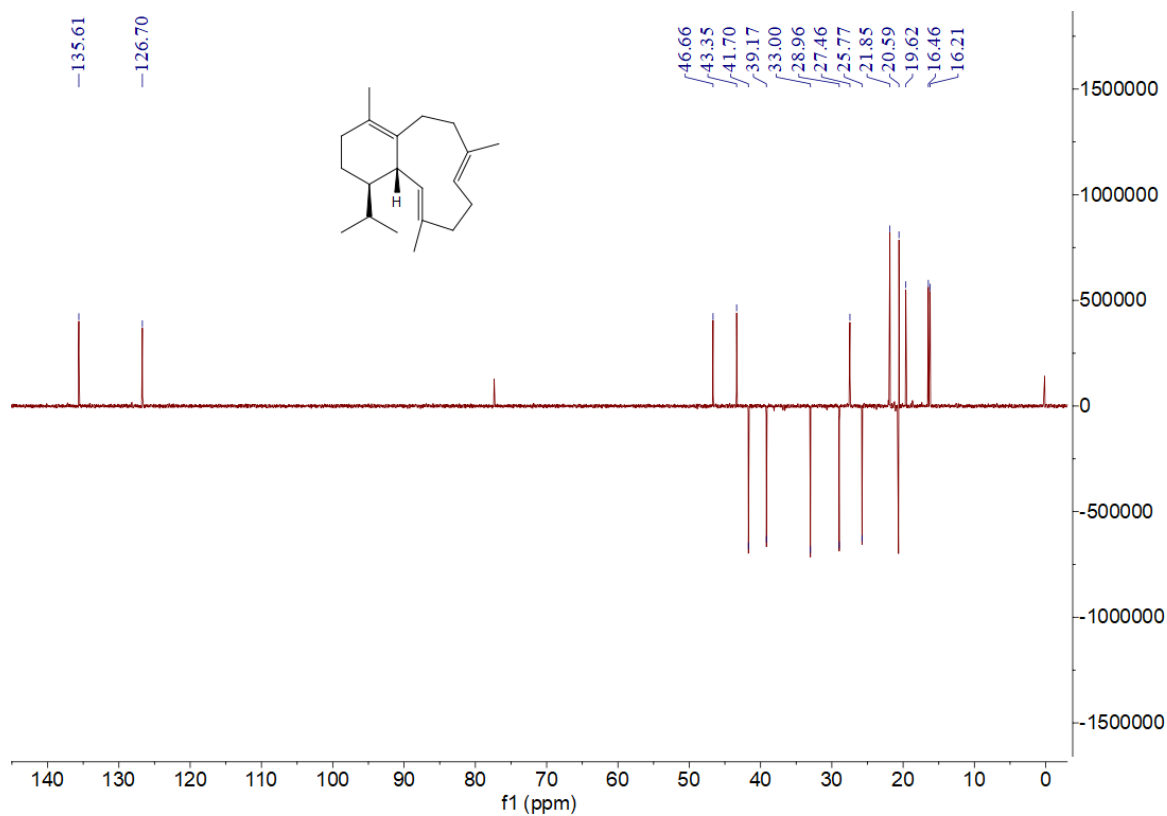

**Fig. S8.** DEPT<sup>135</sup> spectrum (150 MHz) of compound **4** in CDCl<sub>3</sub>.



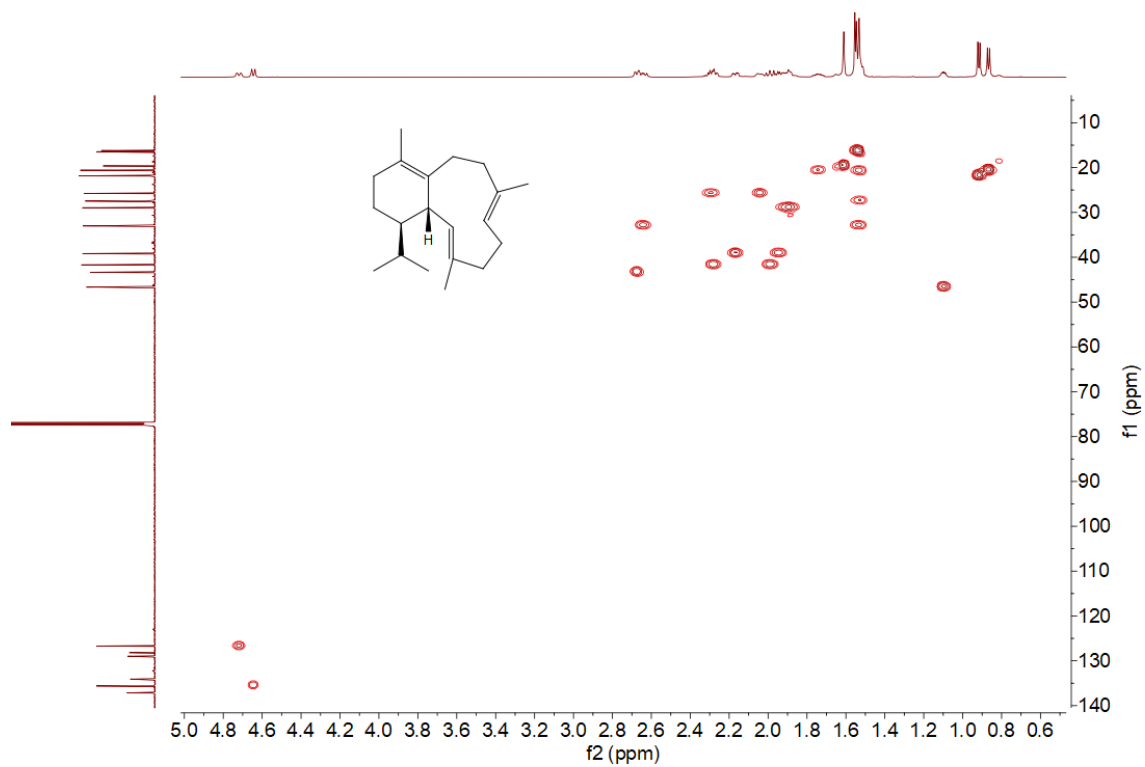

**Fig. S9.** HSQC NMR spectrum of compound **4** in CDCl<sub>3</sub>.

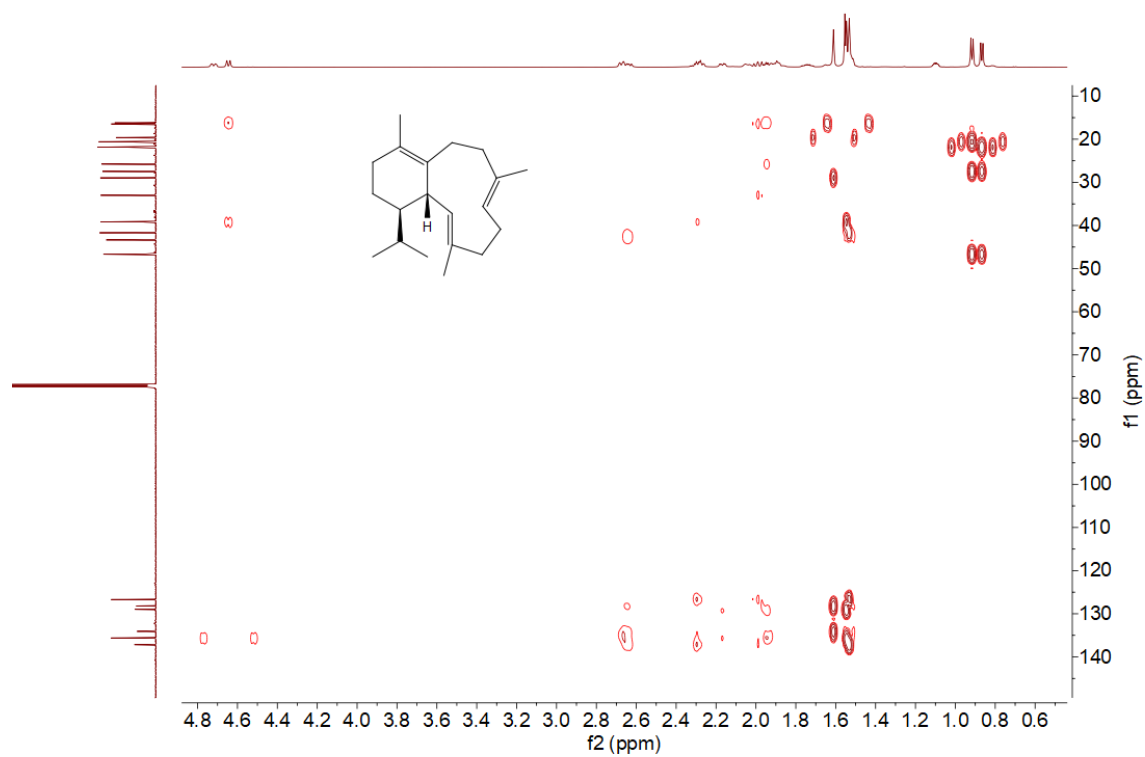

**Fig. S10.** HMBC NMR spectrum of compound **4** in  $\text{CDCl}_3$ .

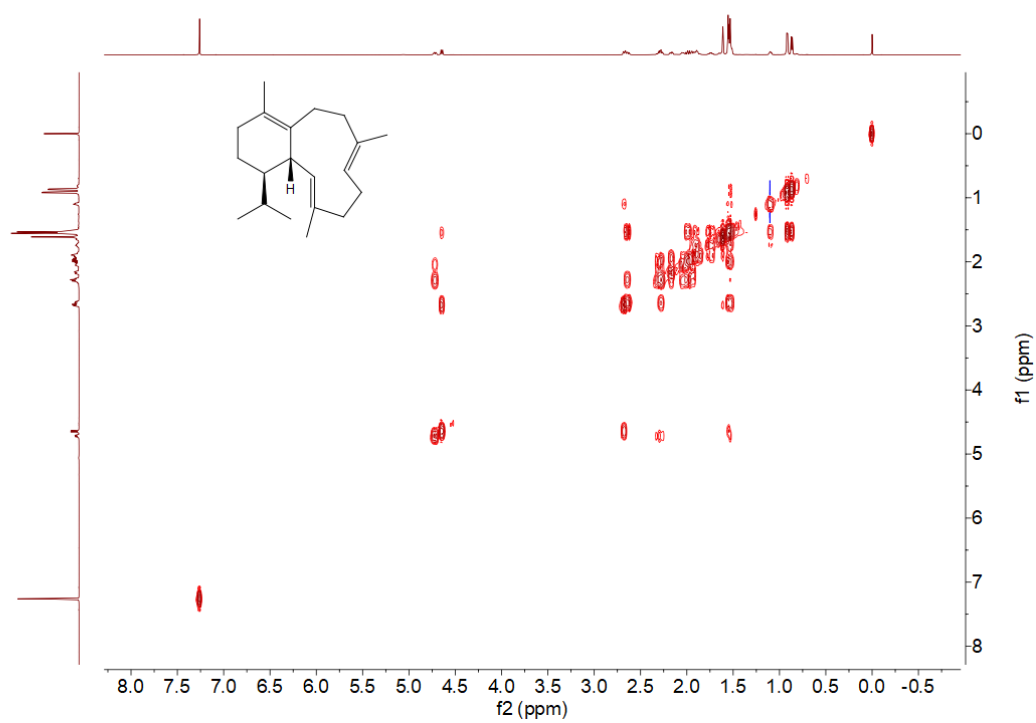

**Fig. S11.**  $^1\text{H}$ - $^1\text{H}$  COSY NMR spectrum of compound **4** in  $\text{CDCl}_3$ .

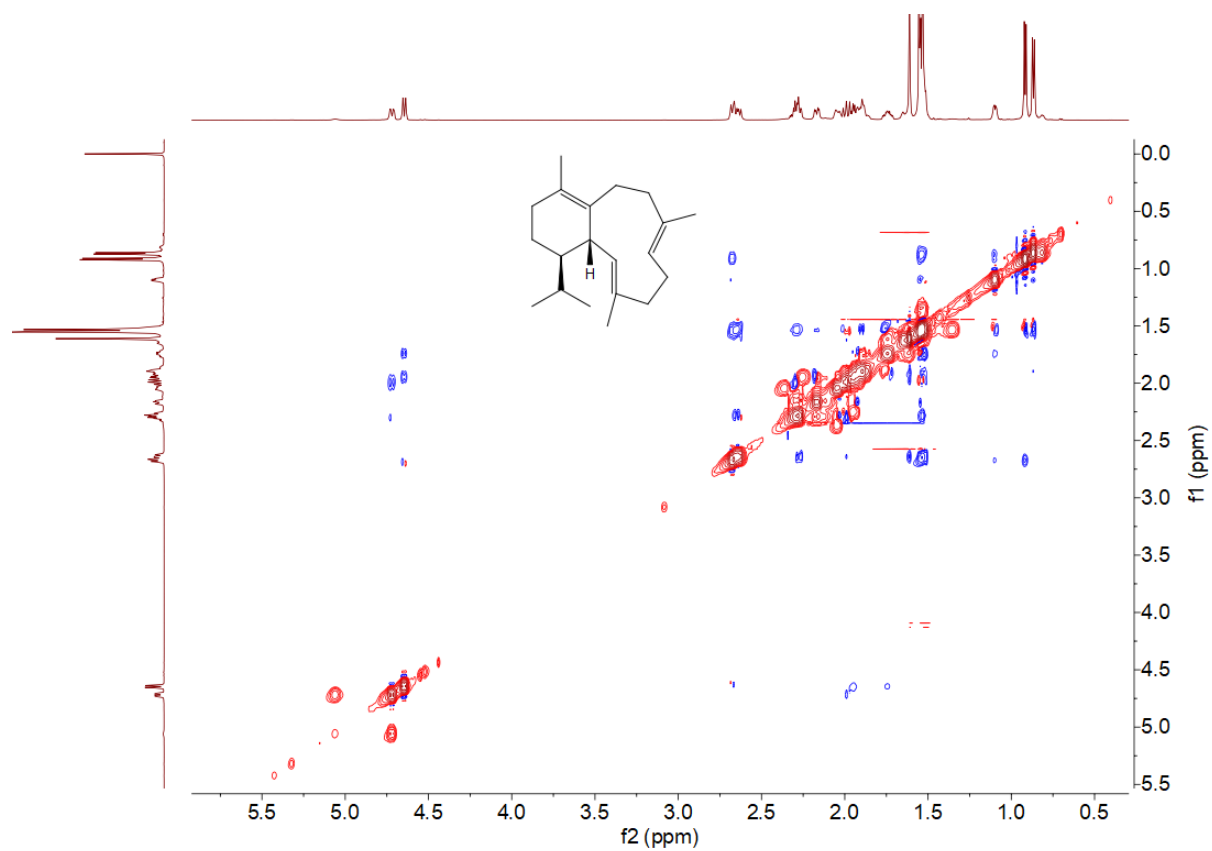

**Fig. S12.** NOESY NMR spectrum of compound **4** in  $\text{CDCl}_3$ .

**Original spectra for compound 5.**

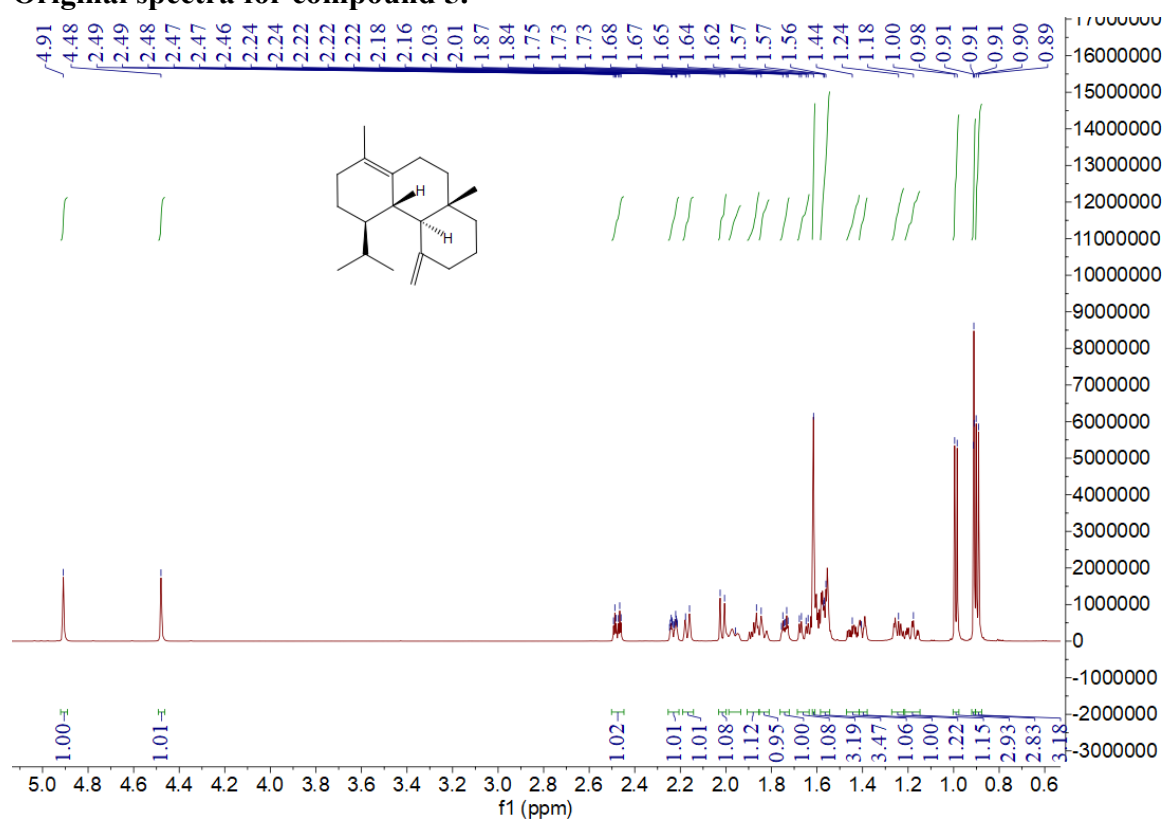

**Fig. S13.**  $^1\text{H}$  NMR spectrum (600 MHz) of compound **5** in  $\text{CDCl}_3$ .

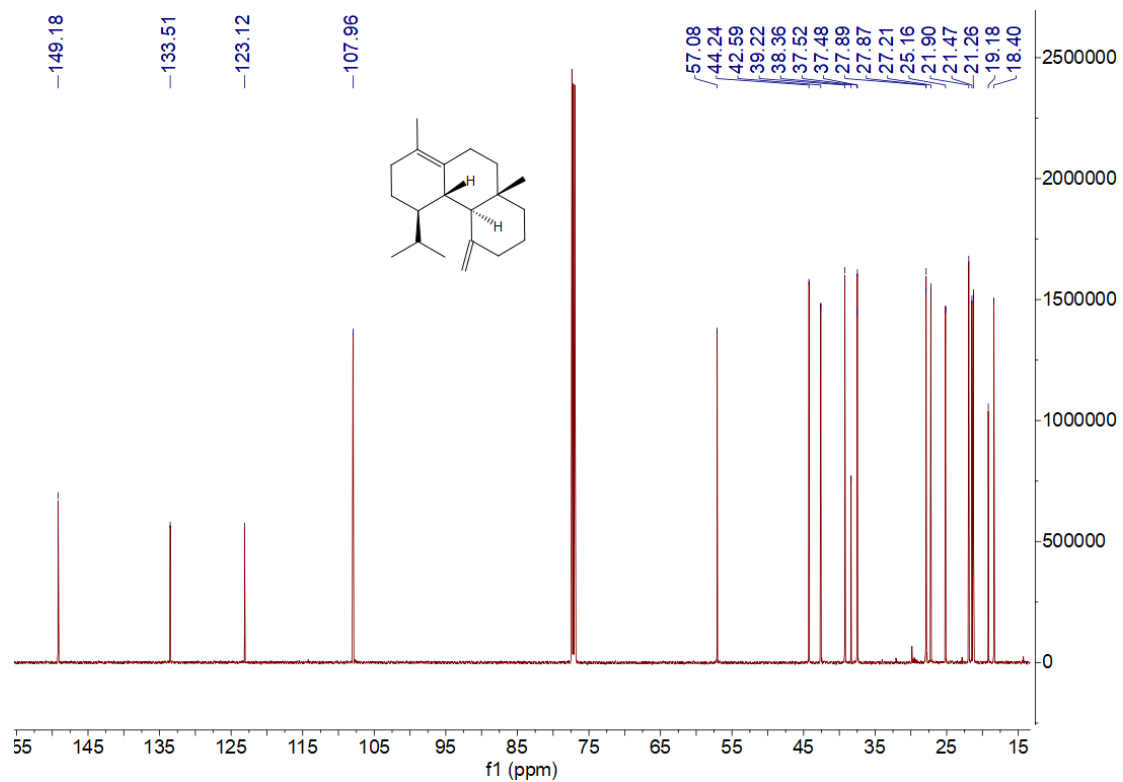

**Fig. S14.**  $^{13}\text{C}$  NMR spectrum (150 MHz) of compound **5** in  $\text{CDCl}_3$ .



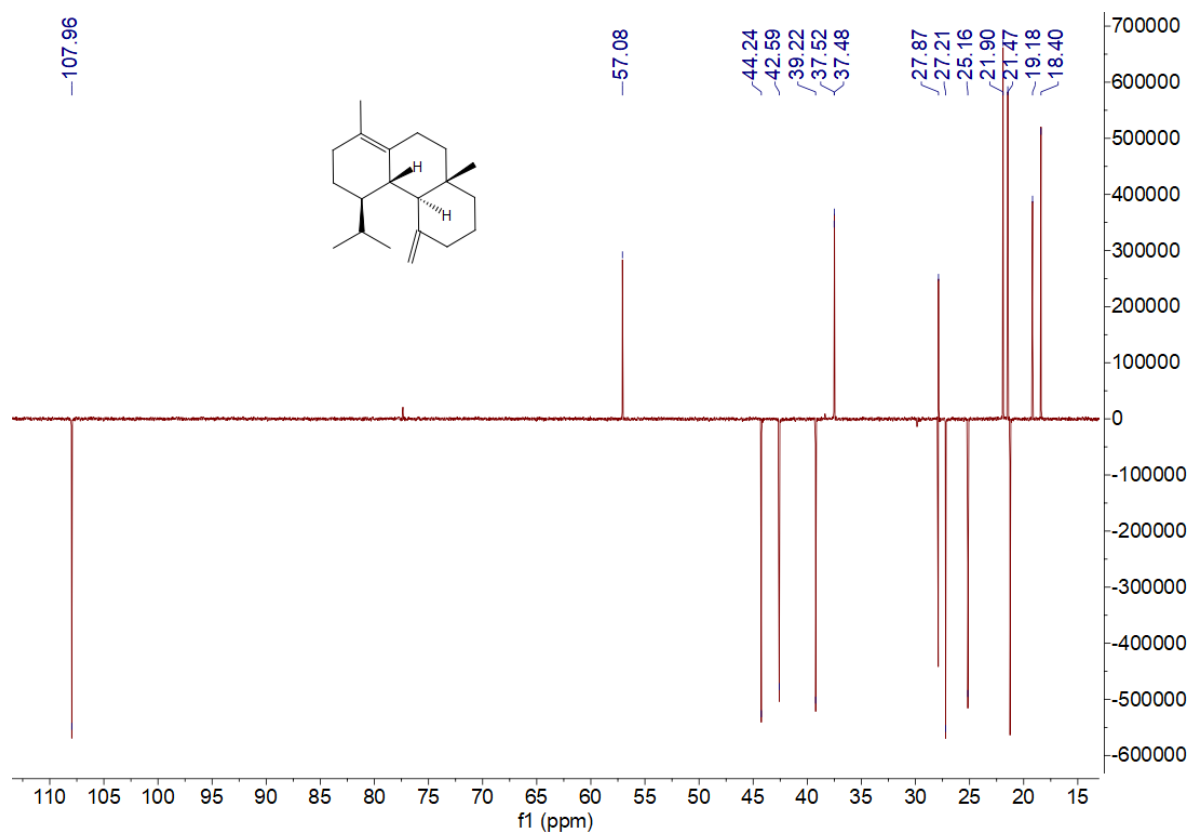

**Fig. S15.** DEPT<sup>135</sup> spectrum (150 MHz) of compound **5** in CDCl<sub>3</sub>.

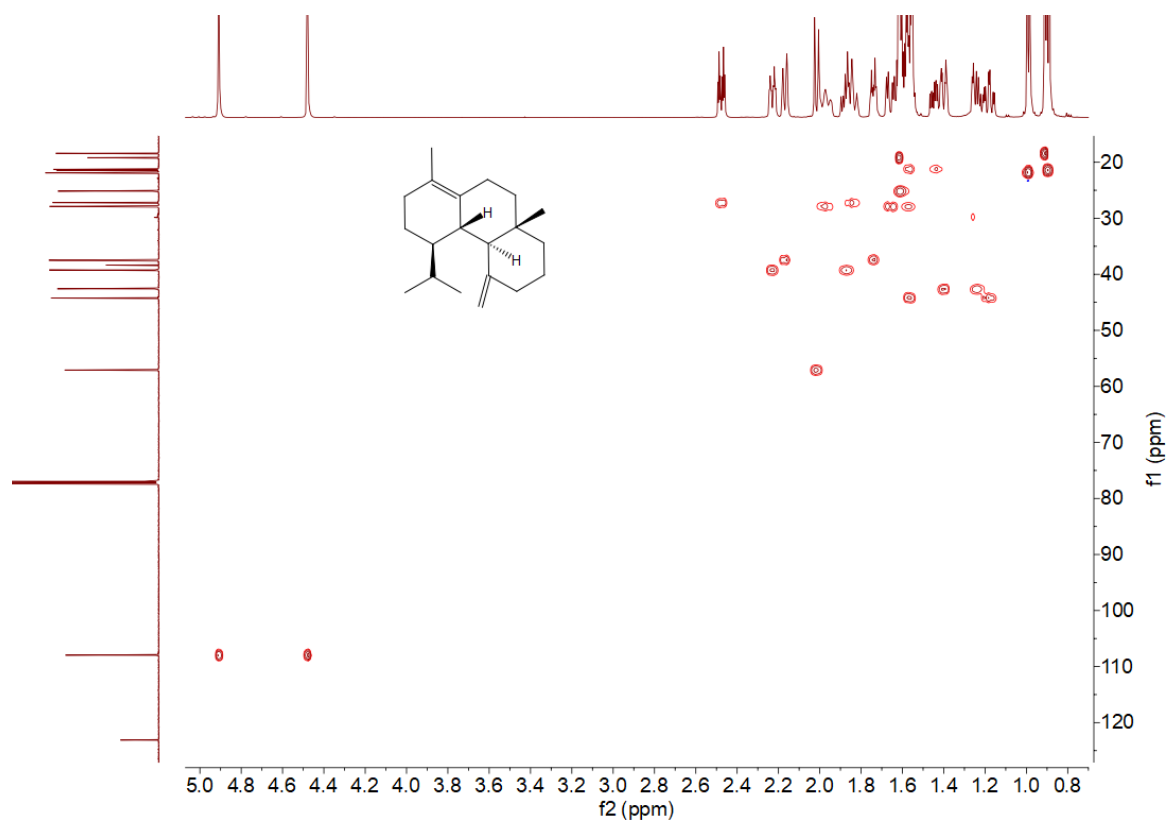

**Fig. S16.** HSQC NMR spectrum of compound **5** in CDCl<sub>3</sub>.

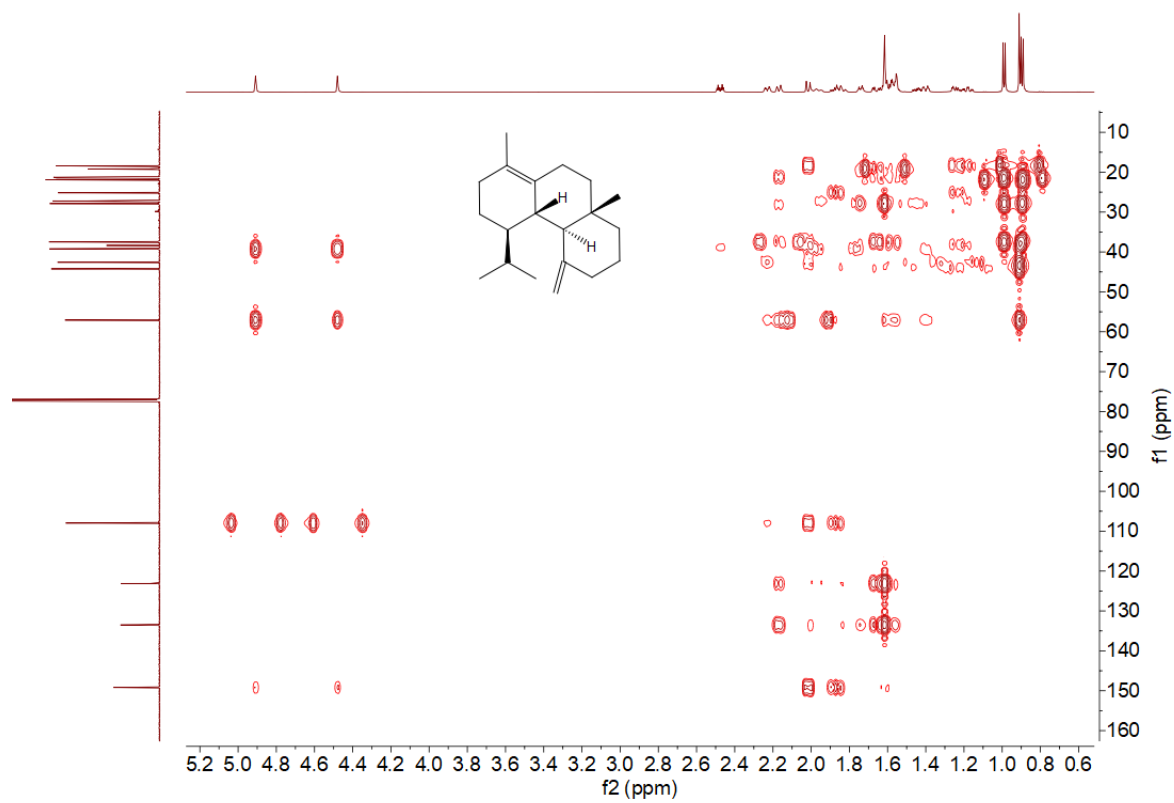

**Fig. S17.** HMBC NMR spectrum of compound **5** in  $\text{CDCl}_3$ .

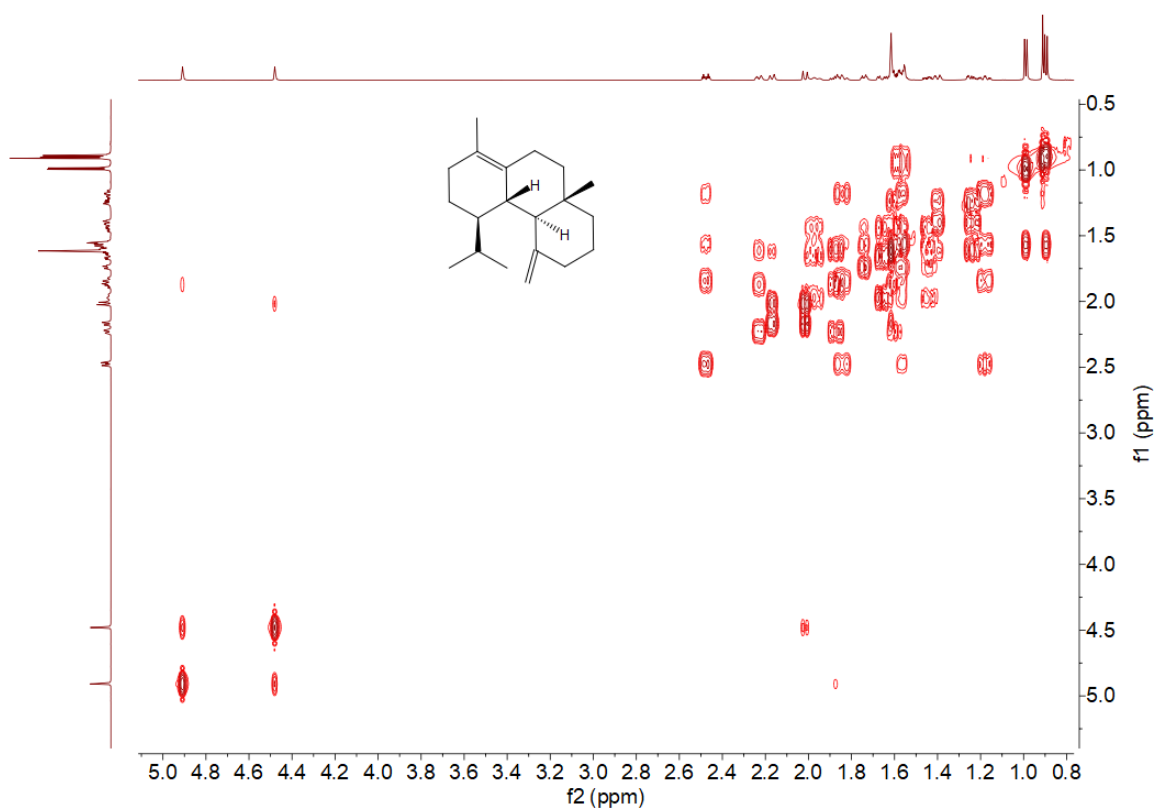

**Fig. S18.**  $^1\text{H}$ - $^1\text{H}$  COSY NMR spectrum of compound **5** in  $\text{CDCl}_3$ .

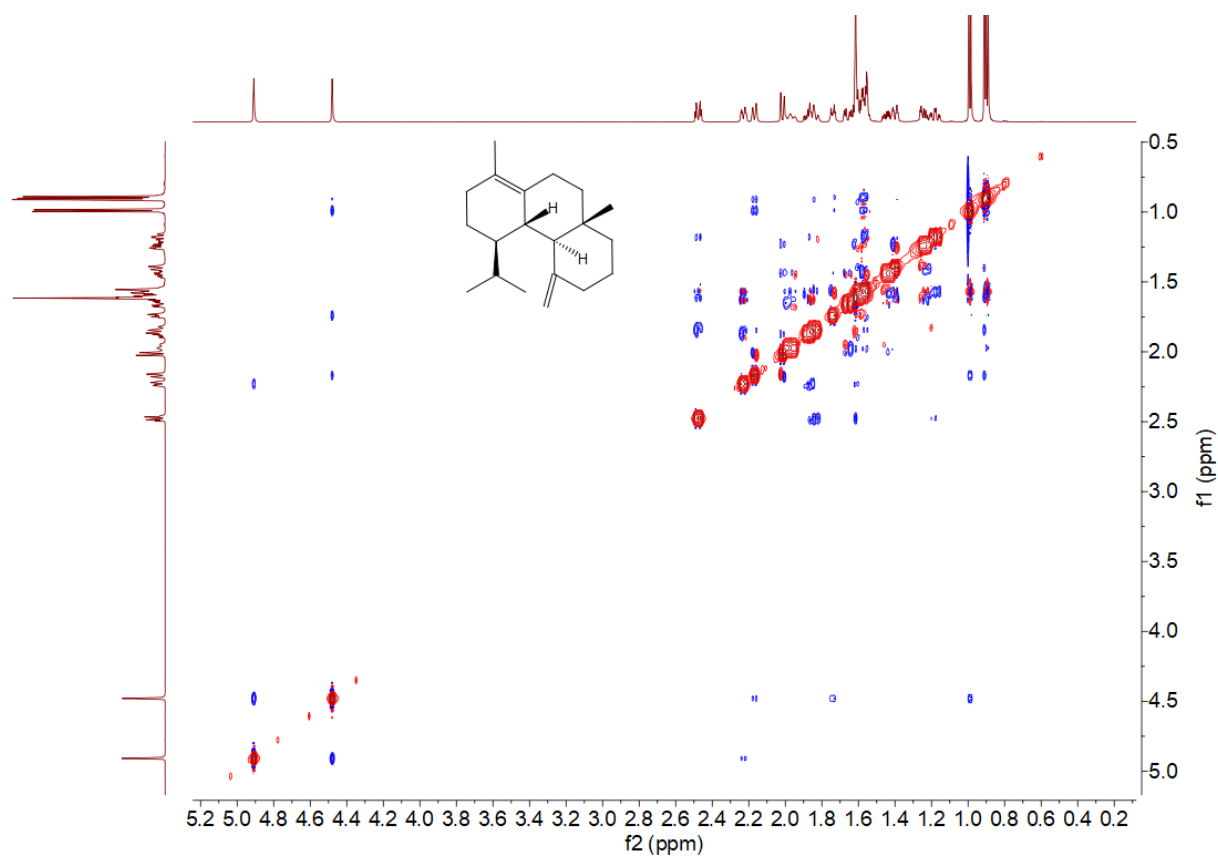

**Fig. 19.** NOESY NMR spectrum of compound **5** in CDCl<sub>3</sub>.

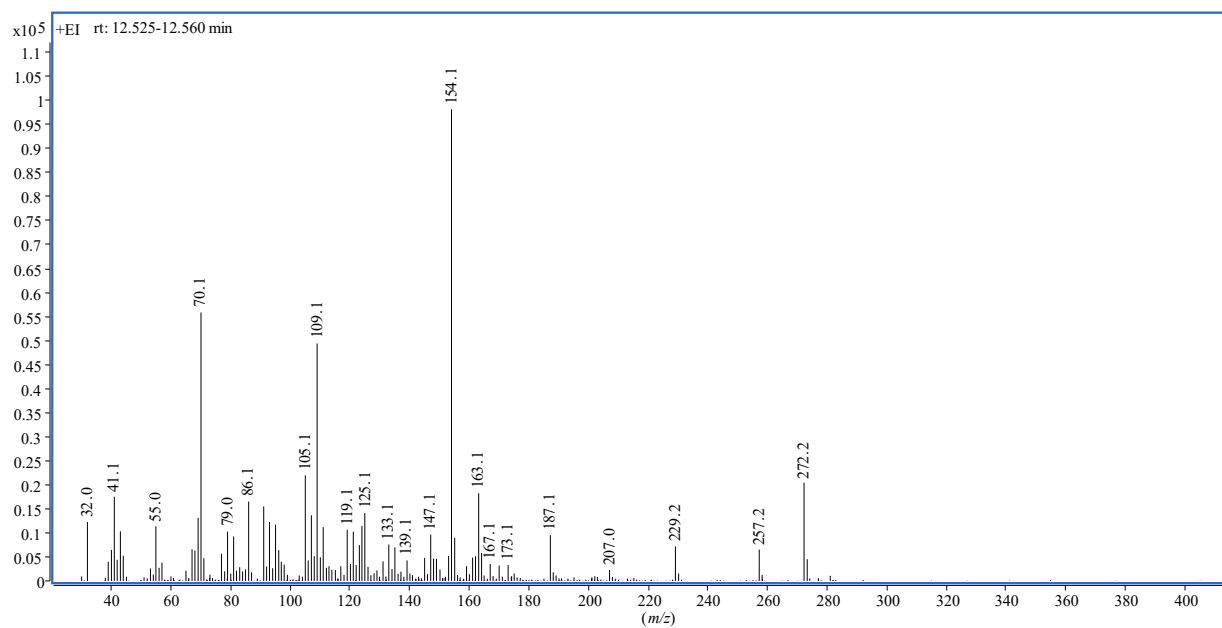

**Fig. S20.** GC-MS spectrum of compound **5**.



Original spectra for compound 5a.

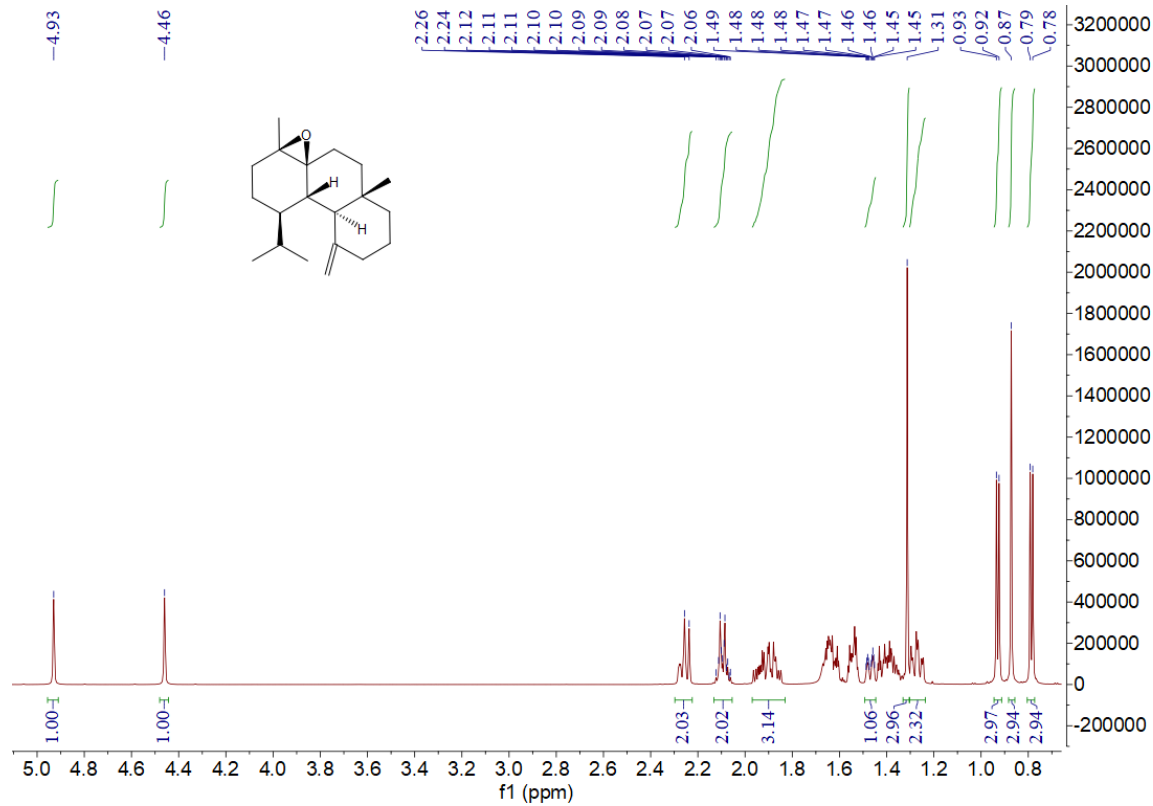

**Fig. S22.**  $^1\text{H}$  NMR spectrum (400 MHz) of compound 5a in  $\text{CDCl}_3$ .

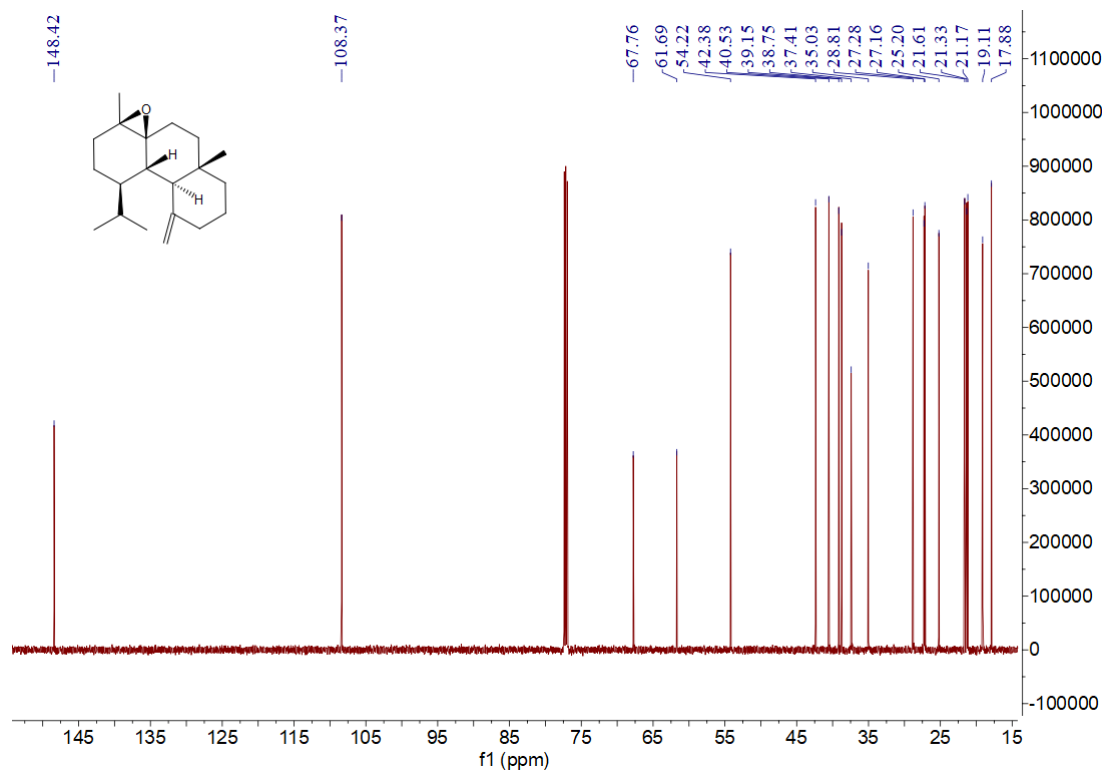

**Fig. S23.**  $^{13}\text{C}$  NMR spectrum (100 MHz) of compound **5a** in  $\text{CDCl}_3$ .

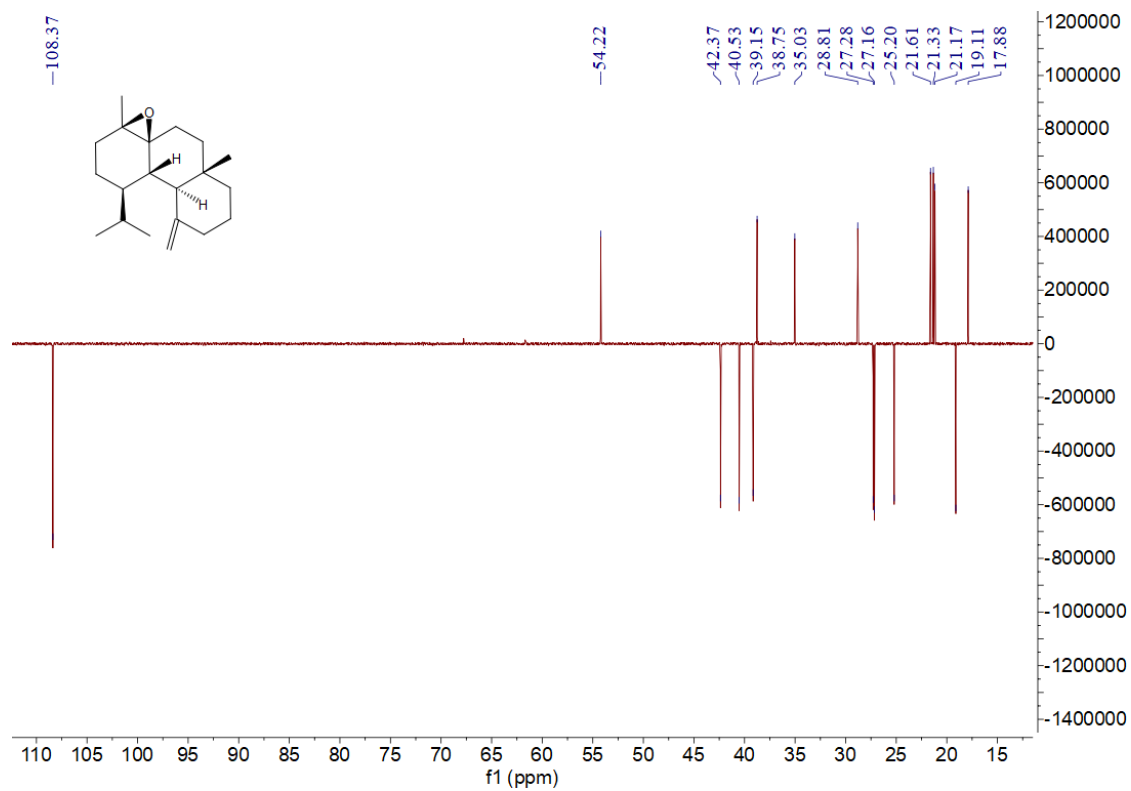

**Fig. S24.** DEPT<sup>135</sup> spectrum (100 MHz) of compound **5a** in CDCl<sub>3</sub>.

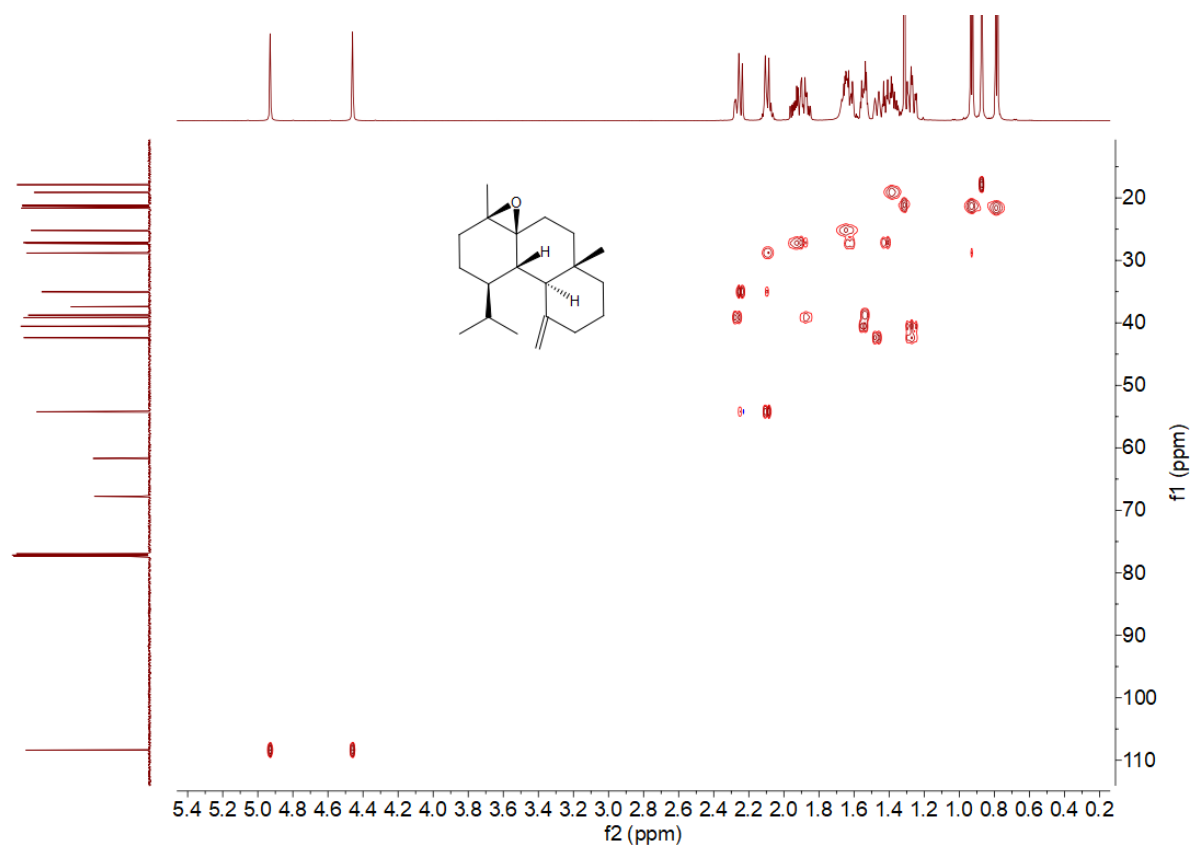

**Fig. S25.** HSQC NMR spectrum of compound **5a** in  $\text{CDCl}_3$ .

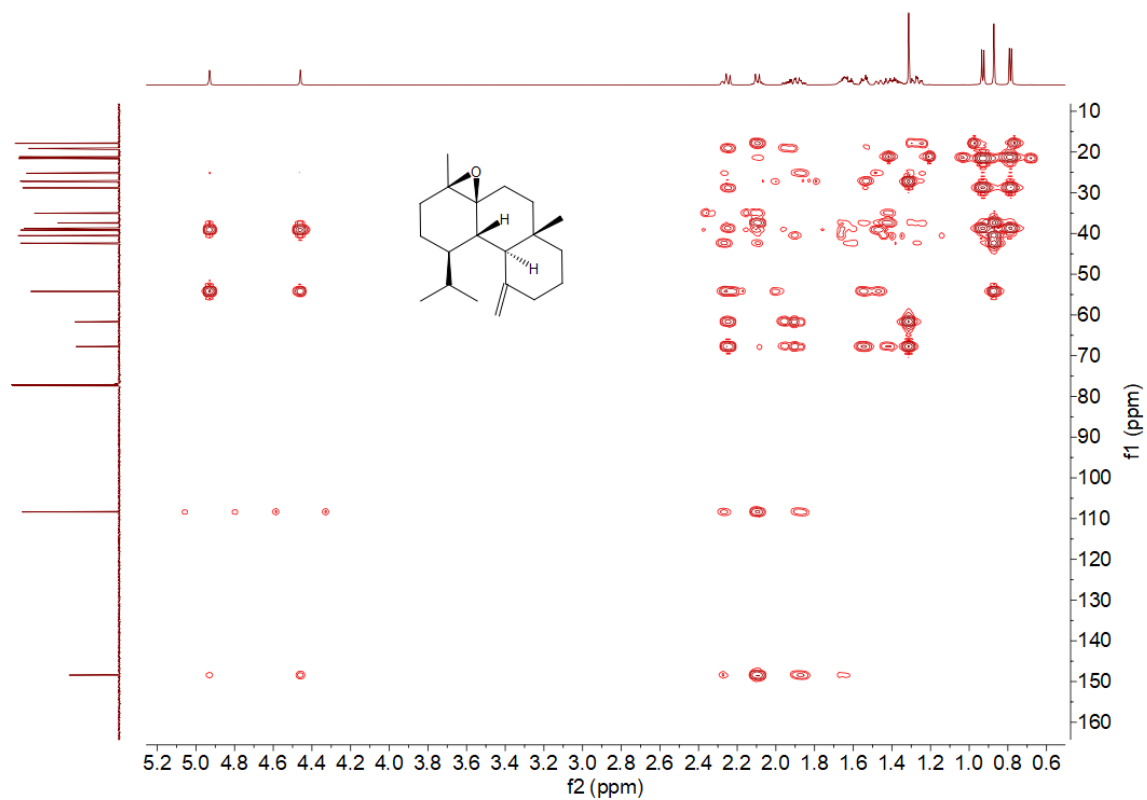

**Fig. S26.** HMBC NMR spectrum of compound **5a** in  $\text{CDCl}_3$ .

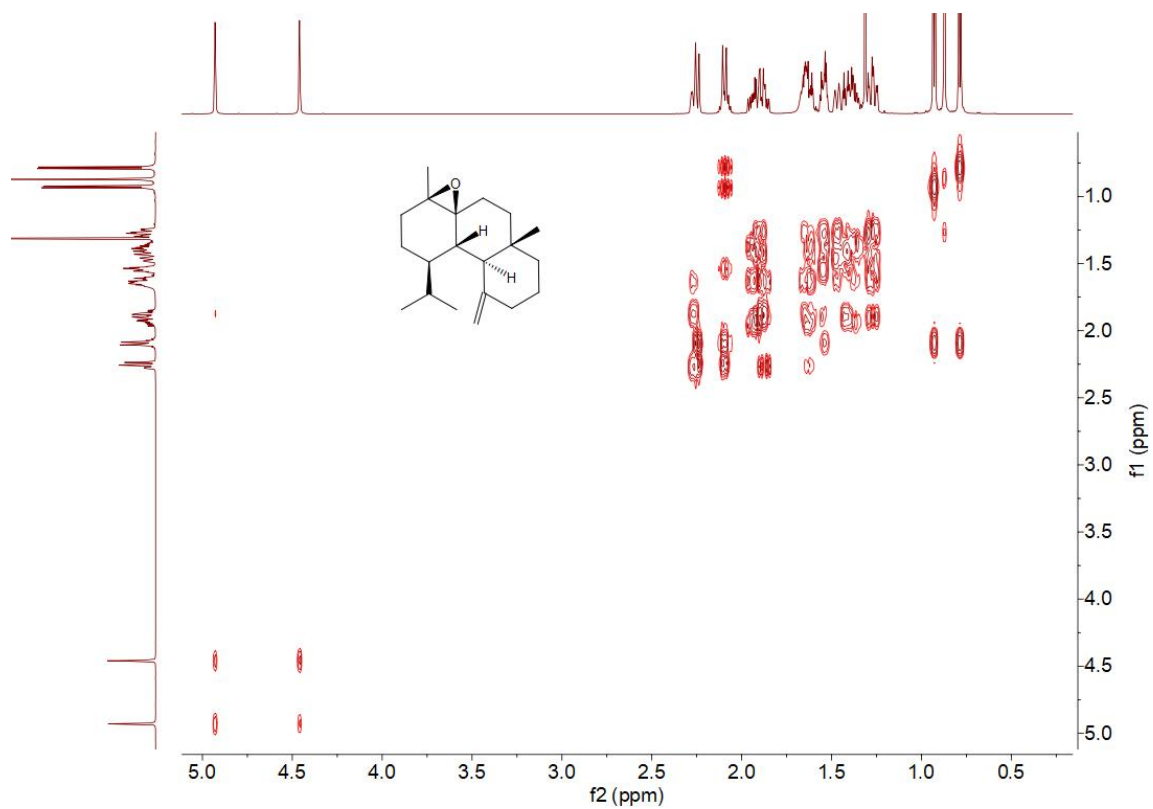

**Fig. S27.**  $^1\text{H}$ - $^1\text{H}$  COSY NMR spectrum of compound **5a** in  $\text{CDCl}_3$ .



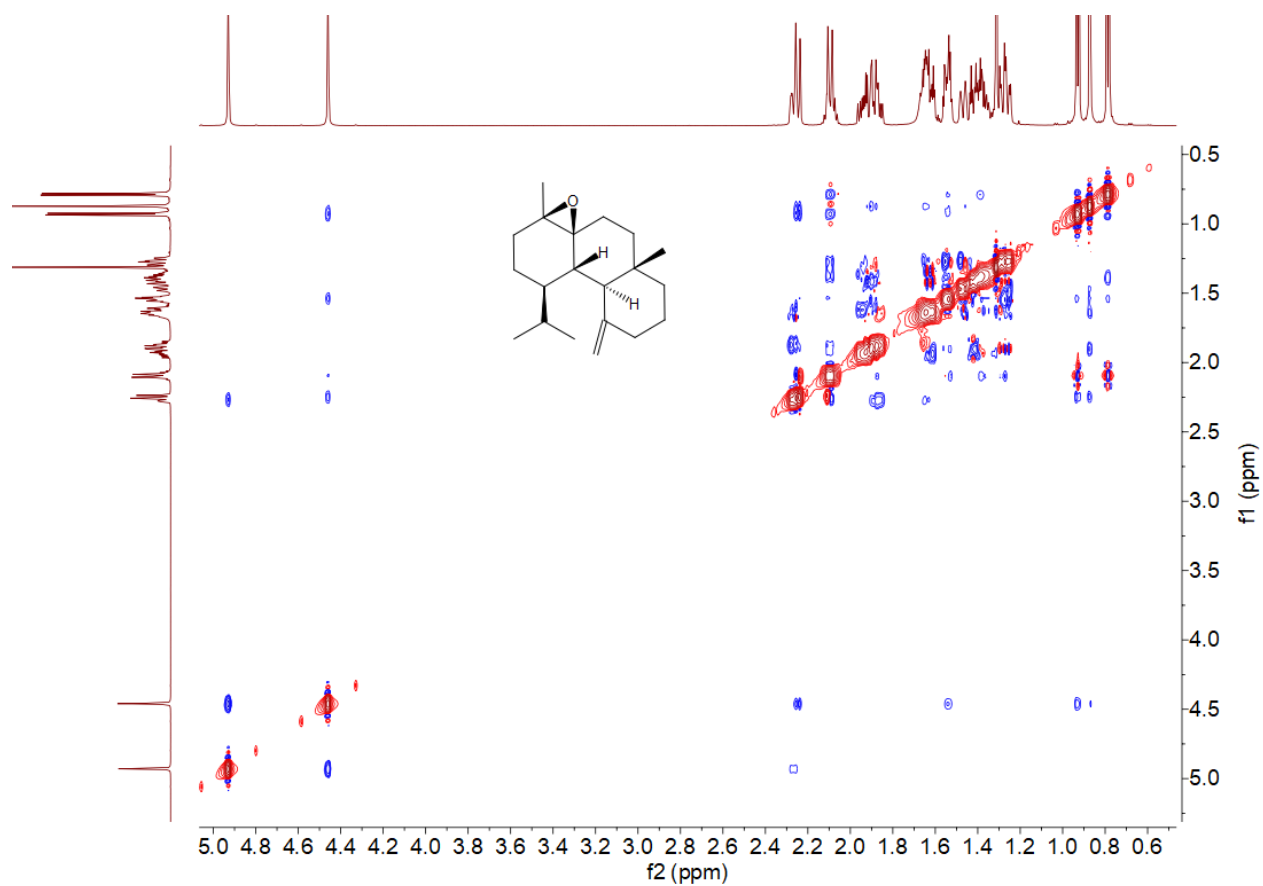

**Fig. S28.** NOESY NMR spectrum of compound **5a** in  $\text{CDCl}_3$ .

# Qualitative Analysis Report

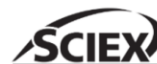

Date: 2025-08-29

File name: FitA1A3

Polarity: +

Instrument: Sciex ZenoTOF™ 7600

## MS spectra

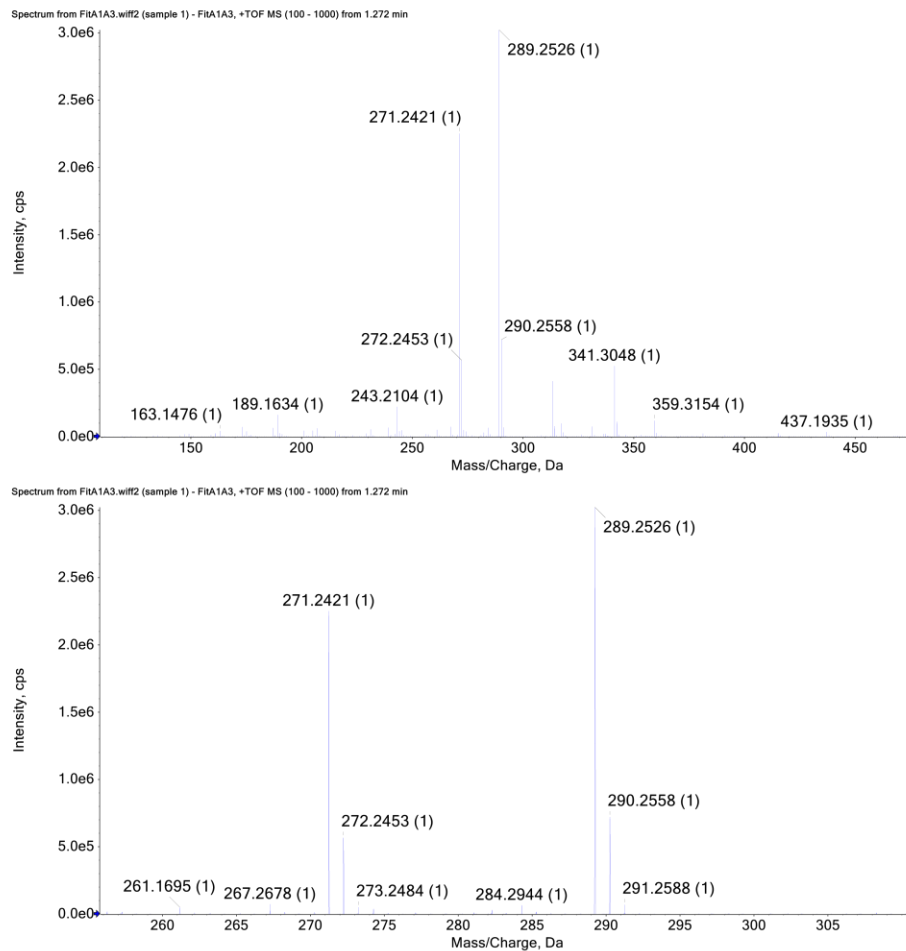

## Formula Calculator Results

| Measured m/z | Cal m/z  | Error(mmu) | Error(ppm) | Ion Formula | Ion                                 |
|--------------|----------|------------|------------|-------------|-------------------------------------|
| 289.2526     | 289.2526 | 0          | 0          | C20H33O     | [M+H] <sup>+</sup>                  |
| 271.2421     | 271.2421 | 0          | 0          | C20H31      | [M+H-H <sub>2</sub> O] <sup>+</sup> |

Fig. S29. HRESIMS spectrum of compound **5a**.

**Table S1. Strains and plasmids used in this study.**

| Strain                            | Description                               | Source                       |
|-----------------------------------|-------------------------------------------|------------------------------|
| <i>E. coli</i> Turbo              | Host for general cloning                  | Shanghai Weidi Biotechnology |
| <i>E. coli</i> BL21 Gold<br>(DE3) | Host for high-level protein<br>production | Shanghai Weidi Biotechnology |

**Table S2. Primer sequences used in this study.**

| Primer         | Nucleotide Sequence (5'–3')                    | Purpose                                                                       |
|----------------|------------------------------------------------|-------------------------------------------------------------------------------|
| SsFitTS-F      | AGCAAATGGGTCGCGGATCCATGAA<br>GATCCCCCTGCTCGC   | SsFitTS mutant<br>amplification for<br>expression in <i>E.</i><br><i>coli</i> |
| SsFitTS-R      | TCGAGTGC GGCCGCAAGCTTTCAGC<br>GGCCCCGCGCGGG    |                                                                               |
| SsFitTSQ51E-F  | ACGACCATAACGGCTTCGGGAGCT<br>GGCCGCCCCGCATCTA   | SsFitTS<br>mutagenesis for<br>Q51E                                            |
| SsFitTSQ51E-R  | TAGATGCGGGCGGCCAGCTCCCCGA<br>AGCCGGTATGGTCGT   |                                                                               |
| SsFitTSI72M-F  | TGACCCTGATCTCCCGCTGGATGGCC<br>ATCTGGGCCATCTT   | SsFitTS<br>mutagenesis for<br>I72M                                            |
| SsFitTSI72M-R  | AAGATGGCCAGATGGCCATCCAGC<br>GGGAGATCAGGGTCA    |                                                                               |
| SsFitTSI182M-F | GGTTCGGGGGCATGCGCATGGCGAT<br>GGACCTGGCCGAAC    | SsFitTS<br>mutagenesis for<br>I182M                                           |
| SsFitTSI182M-R | AGTTCGGCCAGGTCCATCGCCATGCG<br>CATGCCCCCCGAACC  |                                                                               |
| SsFitTSA185S-F | GGTTCGGGGGCATCCGCATGTCGAT<br>GGACCTGGCCGAAC    | SsFitTS<br>mutagenesis for<br>A185S                                           |
| SsFitTSA185S-R | AGTTCGGCCAGGTCCATCGACATGC<br>GGATGCCCCCCGAACC  |                                                                               |
| SsFitTSA218V-F | ACAACCTGGGCGACATCGTCTGTG<br>GGCCAACGACATCTT    | SsFitTS<br>mutagenesis for<br>A218V                                           |
| SsFitTSA218V-R | AAGATGTCGTTGGCCACAGGACGA<br>TGTCGCCAGGTTGT     |                                                                               |
| SsFitTSD230E-F | ATCTTCTCCCTGACCGTGAACTGGA<br>GGAGGGCAACGTCT    | SsFitTS<br>mutagenesis for<br>D230E                                           |
| SsFitTSD230E-R | AGACGTTGCCCTCCTCCAGTTCACG<br>GTCAGGGAGAAGAT    |                                                                               |
| MicA-F         | AGCAAATGGGTCGCGGATCCATGAC<br>CTTACCGTCCCGGA    | MicA mutant<br>amplification for<br>expression in <i>E.</i><br><i>coli</i>    |
| MicA-R         | TCGAGTGC GGCCGCAAGCTTTCACG<br>GCTGCCCGGCGCGCT  |                                                                               |
| MicAE53Q-F     | CGACCGGACGCGGTTGCGCCAACTC<br>GTGGCCCGGGCCTAT   | MicA mutagenesis<br>for E53Q                                                  |
| MicAE53Q-R     | ATAGGCCCCGGGCCACGAGTTGGCCG<br>AACC GCGTCCGGTCG |                                                                               |
| MicAM184I-F    | CGGCGCCGCTTTGGCGGCATTCGCCC<br>GTCGATGGACCTGT   | MicA mutagenesis<br>for M184I                                                 |
| MicAM184I-R    | ACAGGTCCATCGACGGGCGAATGCC<br>GCCAAAGCGGCGCCG   |                                                                               |
| MicAE232D-F    | TTCTCCGTCGAGGCCGACAAGCGCG<br>AGGGCAACGTCAATA   | MicA mutagenesis<br>for E232D                                                 |
| MicAE232D-R    | TATTGACGTTGCCCTCGCGCTTGTCG<br>GCCTCGACGGAGAA   |                                                                               |

**Table S3.  $^1\text{H}$  (600 MHz) and  $^{13}\text{C}$  NMR (150 MHz) data of 4 and 5 in  $\text{CDCl}_3$ .**

| NO. | 4                                            |                       | 5                                            |                             |
|-----|----------------------------------------------|-----------------------|----------------------------------------------|-----------------------------|
|     | $\delta_{\text{H}}$ , mult. ( <i>J</i> , Hz) |                       | $\delta_{\text{H}}$ , mult. ( <i>J</i> , Hz) | $\delta_{\text{C}}$ (mult.) |
| 1   | 2.68 (brd, 11.5)                             | 43.4, CH              | 2.17 (d, 11.5)                               | 37.5, CH                    |
| 2   | 4.65 (d, 10.2)                               | 135.6, CH             | 2.02 (d, 11.5)                               | 57.1, CH                    |
| 3   | -                                            | 129.0, C              | -                                            | 149.2, C                    |
| 4a  | 2.17 (dd, 12.0, 5.0)                         | 39.2, CH <sub>2</sub> | 2.23 (m)                                     | 39.2, CH <sub>2</sub>       |
| 4b  | 1.95 (overlapped)                            |                       | 1.87 (overlapped)                            |                             |
| 5   | 2.29 (overlapped)                            | 25.8, CH <sub>2</sub> | 1.61 (overlapped)                            | 25.2, CH <sub>2</sub>       |
| 6a  | 2.04 (m)                                     |                       | 1.40 (dtd, 13.1, 3.3, 1.8)                   | 42.6, CH <sub>2</sub>       |
| 6b  | 4.72 (brd, 11.1)                             | 126.7, CH             | 1.24 (m)                                     |                             |
| 7   | -                                            | 137.2, C              | -                                            | 38.4, C                     |
| 8a  | 2.28 (overlapped)                            | 41.7, CH <sub>2</sub> | 1.57 (overlapped)                            | 44.2, CH <sub>2</sub>       |
| 8b  | 1.99 (overlapped)                            |                       | 1.18 (m)                                     |                             |
| 9a  | 2.64 (t, 8.3)                                | 33.0, CH <sub>2</sub> | 2.48 (dt, 12.9, 3.5)                         | 27.2, CH <sub>2</sub>       |
| 9b  | 1.51 (overlapped)                            |                       | 1.85 (overlapped)                            |                             |
| 10  | -                                            | 134.1, C              | -                                            | 133.5, C                    |
| 11  | -                                            | 128.1, C              | -                                            | 123.1, C                    |
| 12a | 1.89 (m)                                     | 29.0, CH <sub>2</sub> | 1.96 (m)                                     | 27.9, CH <sub>2</sub>       |
| 12b | 1.89 (m)                                     |                       | 1.67 (overlapped)                            |                             |
| 13a | 1.74 (m)                                     | 20.6, CH <sub>2</sub> | 1.56 (overlapped)                            | 21.3, CH <sub>2</sub>       |
| 13b | 1.53 (overlapped)                            |                       | 1.44 (ddd, 13.3, 5.7, 3.4)                   |                             |
| 14  | 1.10 (m)                                     | 46.7, CH              | 2.17 (dt, 10.3, 3.5)                         | 37.5, CH                    |
| 15  | 1.53 (overlapped)                            | 27.5, CH              | 1.57 (overlapped)                            | 27.9, CH                    |
| 16  | 0.92 (d, 6.6)                                | 21.9, CH <sub>3</sub> | 0.90 (d, 6.6)                                | 21.5, CH <sub>3</sub>       |
| 17  | 0.87 (d, 6.7)                                | 20.6, CH <sub>3</sub> | 0.99 (d, 6.6)                                | 21.9, CH <sub>3</sub>       |
| 18  | 1.61 (s)                                     | 19.6, CH <sub>3</sub> | 1.62 (d, 1.3)                                | 19.2, CH <sub>3</sub>       |
| 19  | 1.53 (s)                                     | 16.2, CH <sub>3</sub> | 0.91 (d, 0.8)                                | 18.4, CH <sub>3</sub>       |
| 20  | 1.55 (s)                                     | 16.2, CH <sub>3</sub> | 4.91 (d, 1.8)                                | 108.0, CH <sub>2</sub>      |
|     |                                              |                       | 4.48 (d, 1.8)                                |                             |

**Table S4.  $^1\text{H}$  (400 MHz) and  $^{13}\text{C}$  NMR (100 MHz) data of 5a in  $\text{CDCl}_3$ .**

| NO. | 5a                                      |                             |
|-----|-----------------------------------------|-----------------------------|
|     | $\delta_{\text{H}}$ , mult. ( $J$ , Hz) | $\delta_{\text{C}}$ (mult.) |
| 1   | 2.25 (overlapped)                       | 35.0, CH                    |
| 2   | 2.10 (overlapped)                       | 54.2, CH                    |
| 3   |                                         | 148.4, C                    |
| 4a  | 2.26 (overlapped)                       | 39.1, $\text{CH}_2$         |
| 4b  | 1.87 (overlapped)                       |                             |
| 5a  | 1.65 (m)                                | 25.2, $\text{CH}_2$         |
| 5b  | 1.65 (m)                                |                             |
| 6a  | 1.47 (m)                                | 42.4, $\text{CH}_2$         |
| 6b  | 1.27 (overlapped)                       |                             |
| 7   |                                         | 37.4, C                     |
| 8a  | 1.54 (overlapped)                       | 40.5, $\text{CH}_2$         |
| 8b  | 1.27 (overlapped)                       |                             |
| 9a  | 1.91 (overlapped)                       | 27.2, $\text{CH}_2$         |
| 9b  | 1.42 (m)                                |                             |
| 10  | -                                       | 67.8, C                     |
| 11  | -                                       | 61.7, C                     |
| 12a | 1.91 (overlapped)                       | 27.3, $\text{CH}_2$         |
| 12b | 1.62 (m)                                |                             |
| 13a | 1.38 (m)                                | 19.1, $\text{CH}_2$         |
| 13b | 1.38 (m)                                |                             |
| 14  | 1.54 (overlapped)                       | 38.8, CH                    |
| 15  | 2.09 (overlapped)                       | 28.8, CH                    |
| 16  | 0.79 (d, 6.7)                           | 21.6, $\text{CH}_3$         |
| 17  | 0.93 (d, 6.7)                           | 21.3, $\text{CH}_3$         |
| 18  | 1.38 (s)                                | 19.1, $\text{CH}_3$         |
| 19  | 0.87 (s)                                | 17.9, $\text{CH}_3$         |
| 20  | 4.93 (s)                                | 108.4, $\text{CH}_2$        |
|     | 4.46 (s)                                |                             |
